# Supplementary material for: Grain size of fluvial gravel bars from close-range UAV imagery – uncertainty in segmentation-based data
Source: Copernicus journal article supplement (doi:10.5194/esurf-2022-19), 2022-05-23
Supplement: Supplementary file [file esurf-2022-19-RC1-supplement.pdf]

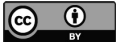

# Grain size of fluvial gravel bars from close-range UAV imagery – uncertainty in segmentation-based data

David Mair<sup>1</sup>, Ariel Henrique Do Prado<sup>1</sup>, Philippos Garefalakis<sup>1</sup>, Alessandro Lechmann<sup>1</sup>, Alexander Whittaker<sup>2</sup>, Fritz Schlunegger<sup>1</sup>

5 <sup>1</sup> Institute of Geological Sciences, University of Bern, Baltzerstrasse 1+3, 3012 Bern, Switzerland

<sup>2</sup> Imperial College, Department of Earth Science and Engineering, South Kensington Campus, London SW7 2AZ, United Kingdom

Correspondence to: David Mair (david.mair@geo.unibe.ch)

**Abstract.** Data on grain sizes of pebbles in gravel-bed rivers are of key importance for the understanding of river systems.

10 To gather these data efficiently, low-cost UAV (unmanned aerial vehicle) platforms have been used to collect images along rivers. Several methods to extract pebble size data from such UAV imagery have been proposed. Yet, despite the availability of information on the precision and accuracy of UAV surveys, a systematic analysis of the uncertainties that might be introduced into the resulting grain size distributions is still missing.

15 Here we present the results of three close-range UAV surveys conducted along Swiss gravel-bed rivers with a consumer-grade UAV. We measure grain sizes on these images by segmenting grains, and we assess the dependency of the results and their uncertainties on the photogrammetric models. We employ a combined bootstrapping and Monte Carlo (MC) modelling approach to model percentile uncertainties while including uncertainty quantities from the photogrammetric model.

Our results show that uncertainty in the grain size dataset is controlled by counting statistics, the selected orthoimage format, and the way the images are segmented. Therefore, our results highlight that grain size data are more precise and accurate, and largely independent on the quality of the photogrammetric model, if the data is extracted from single, undistorted orthoimages. In addition, they reveal that environmental conditions (e.g., exposure to light), which control the quality of the photogrammetric model, also influence the detection of grains during image segmentation, which can lead to a higher uncertainty in the grain size dataset. Generally, these results indicate that even relatively imprecise and not accurate UAV imagery can yield acceptable grain size data, under the conditions that the photogrammetric alignment was successful and that suitable image formats were selected (preferentially single orthoimages).

## 1 Introduction

Knowledge of the particle size distribution and the shape of channel bars in gravel-bed rivers offers a key to both a scientific understanding of fluvial systems and the ecological management of rivers. In addition, constraints on sediment caliber are critical to understand the hydraulic conditions, the mechanisms of sediment transport and the grain-grain interaction during material entrainment, transport and deposition (Piégay et al., 2020). Information on grain size allows us to quantify the

# Summary of Comments on esurf-2022-19.pdf

---

Page: 1

---

- |                                                                                                                                                                                                                                                                                                                                   |                  |                        |                           |
|-----------------------------------------------------------------------------------------------------------------------------------------------------------------------------------------------------------------------------------------------------------------------------------------------------------------------------------|------------------|------------------------|---------------------------|
| Number: 1                                                                                                                                                                                                                                                                                                                         | Author: yourname | Subject: Sticky Note   | Date: 29/06/2022 09:06:56 |
| It might be time to start changing this acronym to 'uncrewed'                                                                                                                                                                                                                                                                     |                  |                        |                           |
| Number: 2                                                                                                                                                                                                                                                                                                                         | Author: yourname | Subject: Sticky Note   | Date: 29/06/2022 09:48:49 |
| This key claim is overly generalised. It's not entirely false and I know that some unknowns remain, but see Dugdale et al 2010 in ESPL (Aerial Photosieving) which give a table for error estimates on grains sizes based on yet more literature. Need to clarify that we do have knowledge of uncertainties due to photosieving. |                  |                        |                           |
| Number: 3                                                                                                                                                                                                                                                                                                                         | Author: yourname | Subject: Sticky Note   | Date: 29/06/2022 09:15:28 |
| do you mean individual, non-mosaicked, images? might be worth clarifying this in the abstract.                                                                                                                                                                                                                                    |                  |                        |                           |
| Number: 4                                                                                                                                                                                                                                                                                                                         | Author: yourname | Subject: Cross-Out     | Date: 29/06/2022 09:14:00 |
| Number: 5                                                                                                                                                                                                                                                                                                                         | Author: yourname | Subject: Inserted Text | Date: 29/06/2022 09:14:10 |
| in                                                                                                                                                                                                                                                                                                                                |                  |                        |                           |
| Number: 6                                                                                                                                                                                                                                                                                                                         | Author: yourname | Subject: Inserted Text | Date: 29/06/2022 09:13:54 |
| ly                                                                                                                                                                                                                                                                                                                                |                  |                        |                           |



thresholds for material transport (e.g., Shields, 1936; Church et al., 1998), to understand and model the transport of sediment in rivers (e.g., Attal et al., 2015; Dunne and Jerolmack, 2018; Lamb and Venditti, 2016; Whittaker et al., 2010) or to characterize habitats (e.g., Kondolf and Wolman, 1993). It further allows predicting the probability of sediment entrainment (Schlunegger et al., 2020), and to assess the impact of infrastructure on the material transport (e.g., Grant, 2012). Standard methods that have been developed to quantify grain sizes of gravels in rivers involve time-intensive fieldwork (e.g., the Wolman (1954) point counting method), which bears the risk of introducing biases that are rooted in the way the measurements in the field are conducted (e.g., Wolcott and Church, 1991; Bunte and Abt., 2009). To reduce the effort and time involved in collecting data by hand, and the possible biases therein, methods for grain size estimation based on image data have received more attention since the early 2000s (e.g., Carbonneau et al., 2004; Butler et al., 2001). These tools have developed into established methods for the quantification of grain sizes in recent years (Carbonneau et al., 2018; Purinton and Bookhagen, 2019; Detert and Weitbrecht, 2012). This development was assisted by the technological improvement of unmanned aerial vehicles (UAVs) and low-cost photogrammetric software packages, which allow a large number of relatively high-resolution topographic data from images to be collected (e.g., Eltner et al., 2016; Woodget et al., 2018). In particular, the use of the Structure from Motion technique (SfM; Eltner and Sofia, 2020; Fonstad et al., 2013; James and Robson, 2012) has yielded various topographic datasets, such as digital elevation models (DEMs), orthoimages and orthoimage mosaics, and 3D point clouds. Such data has offered the basis to extract grain size information from fluvial gravel bars (Woodget et al., 2018). Several studies resulted in the development of methods for the grain size estimation that are tailored to specific UAV workflows and survey designs (e.g., Carbonneau et al., 2018; Vázquez-Tarrío et al., 2017; Woodget and Austrums, 2017). Consequently, over the last few years, significant effort has been directed toward quantifying and reducing the uncertainties related to SfM models (e.g., James et al., 2017a, 2017b; O'Connor et al., 2017; Sanz-Ablanedo et al., 2020; Smith and Vericat, 2015). In contrast, relatively few studies have been conducted towards analyzing the uncertainties that are introduced by the design of the UAV survey, the selection of the image processing approach and the way in which grain size data is subsequently extracted from these images (Pearson et al., 2017; Woodget et al., 2018). Despite the fact that all data on grain size can only be as precise and accurate as the underlying image or topographic model, a systematic evaluation of the method of choice, which particularly considers the related uncertainties, is still scarce for such data (Piégay et al., 2020). Furthermore, recent work demonstrates that widely used survey strategies and camera lenses in UAV platforms might still introduce systematic biases to SfM data (James et al., 2020; Sanz-Ablanedo et al., 2020), thereby pointing to the need to re-evaluate some previous UAV survey recommendations (i.e., survey geometry, image acquisition format and some parameters for camera lens modelling).

This paper addresses this challenge. Here we present the results of three close-range UAV surveys conducted along Swiss gravel-bed rivers (Fig. 1), for which we developed SfM topographic models. From these models, we extracted undistorted images for grain size analysis and for estimates of model uncertainties. The focus is to assess the dependency of the grain size results on the UAV survey strategy. Consequently, we particularly assess the effect of (i) different image acquisition formats, (ii) specific survey designs recommended by previous authors, and (iii) geo-referencing methods on grain size data.

## Page: 2

---

Number: 1 Author: yourname Subject: Sticky Note Date: 29/06/2022 09:17:05

Worth adding James et al 2014 in ESPL (the one on doming mitigation)

---

Number: 2 Author: yourname Subject: Sticky Note Date: 29/06/2022 09:18:40

Perhaps just an issue of phrasing, but Mike James would strongly object to this statement. If you are referring to how these choices impact grain size estimation, say so more clearly.



65 We do so by first employing existing techniques for assessing the uncertainties in topographic models derived from SfM (James et al., 2017a, 2017b, 2020). We then propagate these uncertainties from the UAV survey through the grain size measurements, which we conduct with an established method (Purinton and Bookhagen, 2019). In particular, we combine the effect of the different UAV and SfM models and their uncertainties with the statistical uncertainties related to the grain size measurements through a combined bootstrap and Monte Carlo (MC) approach.

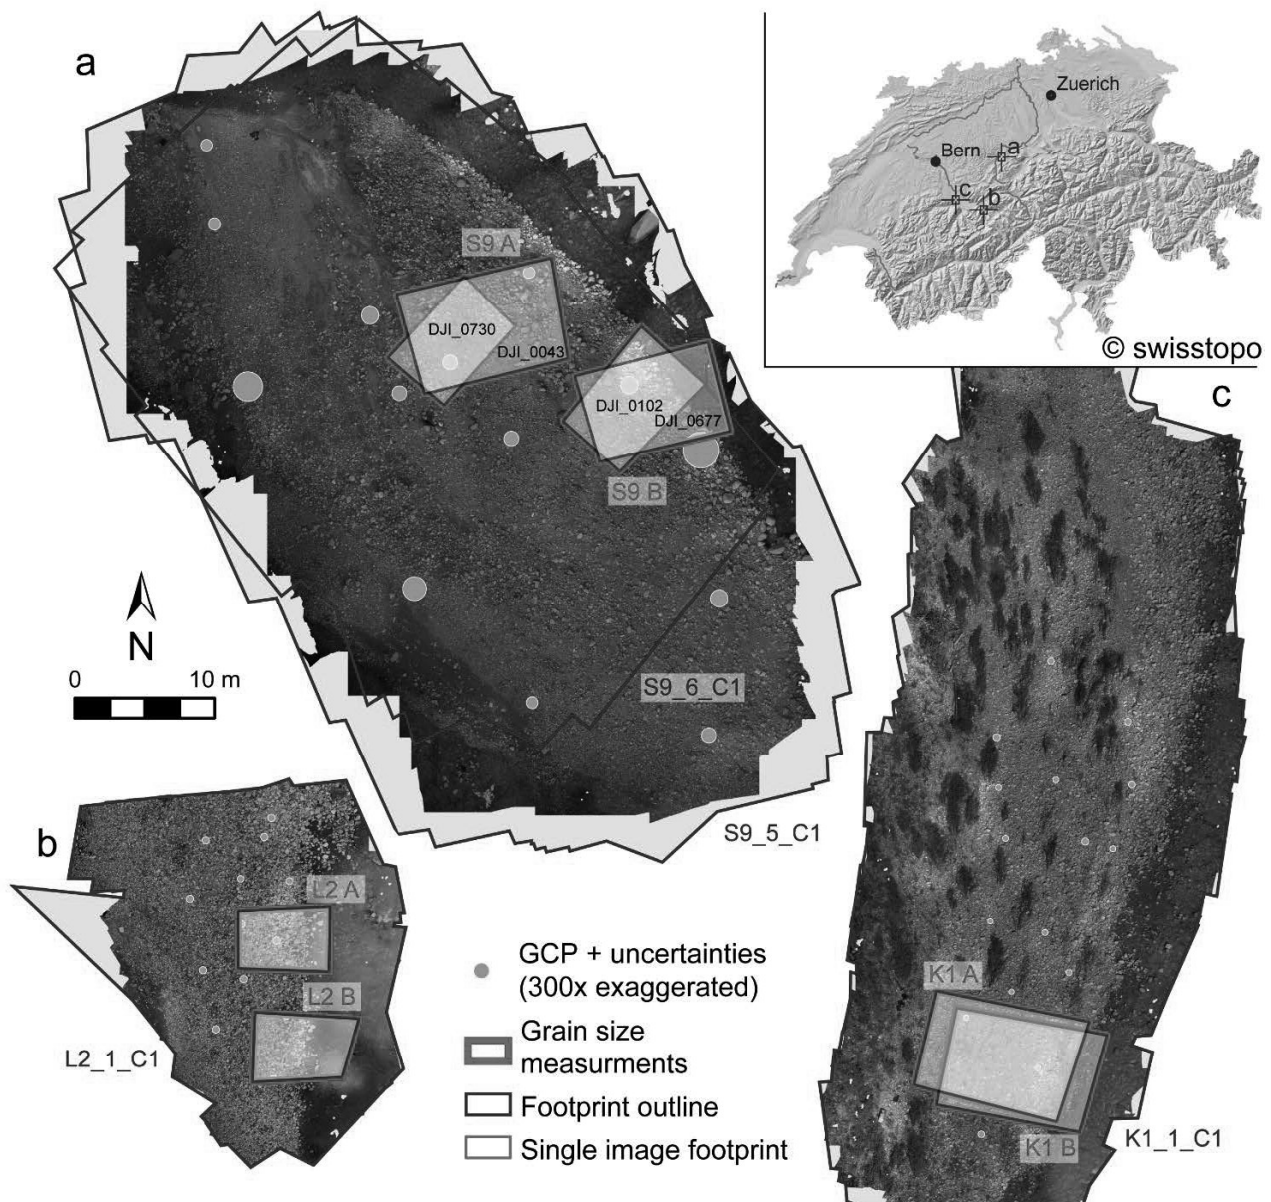

70

**Figure 1:** Overview of the surveyed gravel bars along the selected Swiss rivers (see insert) as overview orthophoto mosaic from the most accurate topographic models (see text for discussion): a) Entle surveys (S9\_5, S9\_6), b) Luetschine survey (L2) and c) Kander survey

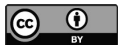

(K1). Regions A and B, which are used for grain size measurements (both orthophoto mosaic and single image) are indicated. GCP = ground control point.

## 75 1.1 Approaches to collect grain size data from digital images

Historically, the collection of grain size data from gravel-bed rivers has relied on time-consuming and laborious physical measurements of clasts in the field (Wolman, 1954; Wohl et al., 1996; Bekaddour et al., 2013; van der Berg and Schlunegger, 2012; Pitlick et al., 2021). Early image-based grain size measurements were conducted with a ‘photo-sieving’ approach (e.g., Ibekken and Schleyer, 1986), which relied on the visual identification of clasts in images from ground-based  
80 cameras. The next step in the improvement of the method was accomplished using two different strategies, which encompassed (i) methods where grain sizes are inferred from statistical properties of image parameters (e.g., image texture, image spectral or frequency content, point cloud roughness; Woodget et al., 2018) and (ii) approaches where the sizes of individual grains are measured through image segmentation (e.g., Detert and Weitbrecht, 2012; Purinton and Bookhagen, 2019; and references therein).

85 Most grain size datasets that were collected with the first set of methods were mainly based on a variety of statistical image parameters, such as semivariance (e.g., Carbonneau et al., 2005), inertia, entropy, grey-level co-occurrence matrices (e.g., Carbonneau et al., 2004; Woodget et al., 2018; Woodget and Austrums, 2017) and autocorrelation (e.g., Rubin, 2004; Buscombe, 2008; Buscombe et al., 2010). In this context, other approaches have exploited the roughness pattern of topographic models from 3D point cloud datasets to estimate grain sizes (e.g., Brasington et al., 2012; Woodget and  
90 Austrums, 2017). All of these methods require an on-site metric calibration in the field (e.g., with a differential GPS or a meters stick) and only deliver a single percentile of a grain size distribution (Purinton and Bookhagen, 2019). Here, an exception is offered by the wavelet decomposition approach of Buscombe (2013), which is able to determine the entire grain size distributions from images without a field-based calibration. However, this only works in a reliable way if grains have nearly the same size and shape. In general, however, the grain size percentile values that resulted from surveys have been  
95 found to be highly variable, which depends on the sorting, the shape and the bedding of the target gravels (Pearson et al., 2017). Such variability in grain size data thus violates the condition of nearly equally sized grains, which is required if one aims to apply the Buscombe (2013) method. Recently, Buscombe (2020) and Lang et al. (2021) have shown that the use of deep learning frameworks allow to avoid the time consuming calibration in the field, which facilitates the remote measurements of grain sizes from scaled or geo-referenced images. However, these machine-learning models do not allow  
100 scales to be transferred to new data, with the consequence that the effort that is needed to train the model for a new setting is quite large (Lang et al., 2021).

Methods based on the segmentation and delineation of individual grains in images constitute the second set of tools. Common approaches rely on edge detection and watershed segmentation (e.g., Butler et al., 2001; Graham et al., 2005; Detert and Weitbrecht, 2012) or most recently on edge detection and *k-means clustering* (Purinton and Bookhagen, 2019).  
105 Grain size measurement through image segmentation is challenging for images with a high visual complexity, i.e., overlapping grains, irregularly shaped, coloured or textured grains, and vegetation or extensive shadows on the images



(Purinton and Bookhagen, 2019). However, the delineation of individual grains in images has the advantage that the result is a continuous grain size distribution. This approach additionally allows the analysis of sub-regions and has the potential to obtain grain size data of individual clast populations, and it offers the possibility to measure clast orientations.

## 110 1.2 Uncertainties related to the photogrammetric structure from motion technique

The rise of widely available and cheap UAV platforms, equipped with stabilizing gimbals and easy-to-use operating applications in combination with low-cost and user-friendly photogrammetric software packages, has resulted in the generation of high-resolution topographic data for various research applications (e.g., Carbonneau et al., 2003; Eltner et al., 2016; Eltner and Sofia, 2020; Fonstad et al., 2013). In this context, the uncertainties and resolution of data processed through SfM (Structure from Motion technique) especially from UAV images can be predicted from photogrammetric principles. They critically depend on technical (i.e., flight geometry, camera angles, usage of ground control points, camera parameters) and environmental parameters, the latter of which are beyond the operator's control (i.e., lightning conditions, local topography, vegetation, weather, GNSS signal strength). The uncertainties in topographic SfM models consist of three components including i) the external accuracy of the reference framework (i.e., scaling, rotation or offset of the entire model) ii) the internal consistency of the model (sometimes called 'precision') and iii) a systematic uncertainty component arising from the photogrammetric principle itself (i.e., 'doming' or 'bowling'). We refer the reader to James et al. (2020), James et al. (2017a, 2017b) and Carbonneau and Dietrich (2017) for a detailed discussion of these uncertainty components. The use of ground control points (GCPs) or the application of differential on-board RTK GNSS (real-time kinematic positioning for global navigation satellite systems) techniques for direct geo-referencing effectively increases the accuracy of the reference framework (James, Robson and Smith, 2017; Sanz-Ablanedo et al., 2020). Image quality and camera calibration parameters control the level of internal precision (sometimes called 'shape' precision; James et al., 2017a). The use of GCPs together with an improved survey geometry and a pre-calibrated camera can significantly increase the internal precision (Carbonneau and Dietrich, 2017; James et al., 2017; O'Connor, Smith and James, 2017; Griffiths and Burningham, 2019). In contrast, the occurrence of a systematic uncertainty can only be detected with GCPs and is still a common problem within SfM processing (e.g., Eltner and Sofia, 2020). The successful mitigation of such systematic biases requires a careful choice of the image network geometry, such as the inclusion of oblique camera angles (James and Robson, 2014) and a successful camera lens modelling during the subsequent generation of a model (e.g., James et al., 2020). Finally, it is noteworthy that uncertainties in models and data from any SfM workflow are derived from the photogrammetric alignment of the images during the generation of the sparse point cloud. Therefore, the uncertainty in the sparse cloud data already includes all uncertainties of the SfM model, independent on the type of the final data model.

Despite the possible drawbacks and limitations as outlined above, UAV images have been processed with SfM workflows over the last decade for various research purposes in the fields of fluvial geomorphology and sedimentology (for an overview see Carrivick and Smith, 2019), including grain size measurements in fluvial systems (e.g., Woodget et al., 2018). Specifically, for automated grain size measurements, Carbonneau et al. (2018) developed the 'robotic photosieving' concept,

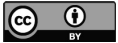

140 which is based on the use of close range, single UAV images that have been processed with a specific SfM pipeline (direct  
geo-referencing, the use of pre-calibrated camera lens models, and surveys with a second flight altitude to better estimate the  
camera positions). Accordingly, in such an approach, only the image distance is effectively used for scaling. Other methods  
use orthophotos and orthophoto-mosaics (Woodget et al., 2018) or 3D point cloud roughness (Woodget and Austrums, 2017)  
to measure the sizes of gravels. The applications of these methods have shown that single images are most accurate for grain  
145 size estimations while image textures or 3D point clouds yield measurement results that are less accurate (Woodget et al.,  
2018). Unfortunately, no systematic evaluation of uncertainties introduced by the UAV SfM approach on such grain size  
estimations exists so far.

## 2 Methods

We acquired UAV images (Sect. 2.1) from rivers situated in the Swiss Alps with a widely used platform following  
150 established survey strategies, which we processed with an established SfM software package (Sect. 2.2). We then used this  
output to measure the sizes of grains and the uncertainty associated with this (Sect. 2.3). The steps of this workflow (Sect.  
2.4) are described below.

### 2.1 UAV surveys

We chose study sites along the Luetschine (referred to as L2 surveys), Entle (S9 surveys) and Kander (K1 surveys) Rivers  
155 that are all situated in the Swiss Alps (Fig. 1). We selected river reaches where gravel bars can be readily identified on  
satellite images and where the local topography offers the opportunity to operate the UAV at different conditions and  
challenges, i.e. due to a vegetation cover, narrow gorges and steep lateral valley borders. We conducted close-range surveys  
with a flight altitude between 5 and 7m above ground to ensure a ground-sampling distance of  $\sim 1.5$  mm (Table 1). In  
general, we targeted a lateral and frontal overlap between individual images in the order of 80%. We distributed GCPs over  
160 the target gravel bars and measured them with a Leica Viva GS14 or a Leica Zeno GG04 plus – GNSS antenna, with a real-  
time online Swipos-GIS/GEO RTK correction. These setups have a horizontal precision of 2 cm and a vertical precision of 4  
cm (for 2 sigma) under ideal conditions (Swisstopo, 2022). All GCPs and their uncertainties used in this survey can be found  
in Table S1.

We diversified the strategy for image acquisition to produce a large range of models, which is considered to resemble a  
165 variety of practical scenarios and strategies (Fig. 2). These scenarios are based on recommendations to include oblique angle  
camera positions (e.g., James and Robson, 2014), images from a second altitude level (e.g., Carbonneau and Dietrich, 2017),  
and referencing strategies with and without GCPs (e.g., James et al., 2017). All these scenarios and models are summarised  
in Figure 2 for the three study areas. Some scenarios are expected to produce topographic models with low accuracy and  
large systematic uncertainty (e.g., single level grid with no GCPs as control points). All images were taken with a DJI  
170 Phantom 4 Pro v2 on-board camera (DJI FC6310), which utilizes a mechanical shutter. For most flights, images were





simultaneously taken in a JPEG and raw (i.e., the unprocessed DNG) image format using the VC Technology's *flylitchi* application (v2.10.0), except for the S9 surveys. There we used two UAV flight plans, for which we acquired the images first as JPEG files and then, during a second flight, in the DNG format. At the L2 and K1 sites, we first acquired a single grid line map. Subsequently, images were taken with oblique and convergent cameras with a pitch of  $> 20^\circ$  at the same survey altitude. At site S9, both surveys were done with oblique and convergent camera angles ( $> 20^\circ$ ) at a higher flight altitude (~10 m). This higher altitude included an additional set of nadir images. These images that were taken at a higher altitude and with an oblique view were acquired during manual flying at all sites. A summary of the survey characteristics is provided in Table 1.

The K1 site at the Kander river offers a setting that is ideal for close-range UAV image acquisition, with little peripheral vegetation and little potential GNSS signal obstruction. In contrast, the L2 site at Luetschine represents challenging UAV survey conditions, due to vegetation and infrastructure limiting the flight area, and because of the narrow valley potentially inhibiting the receipt of GNSS signals. The two surveys at Entle (S9) specifically allow us to test the inter-survey comparability and whether a rapid change in the external parameters such as lighting conditions or moving vegetation introduce a bias, and if such a bias would contribute to the uncertainties in the grain size estimation.

Structure from Motion (SfM) - model referencing strategies

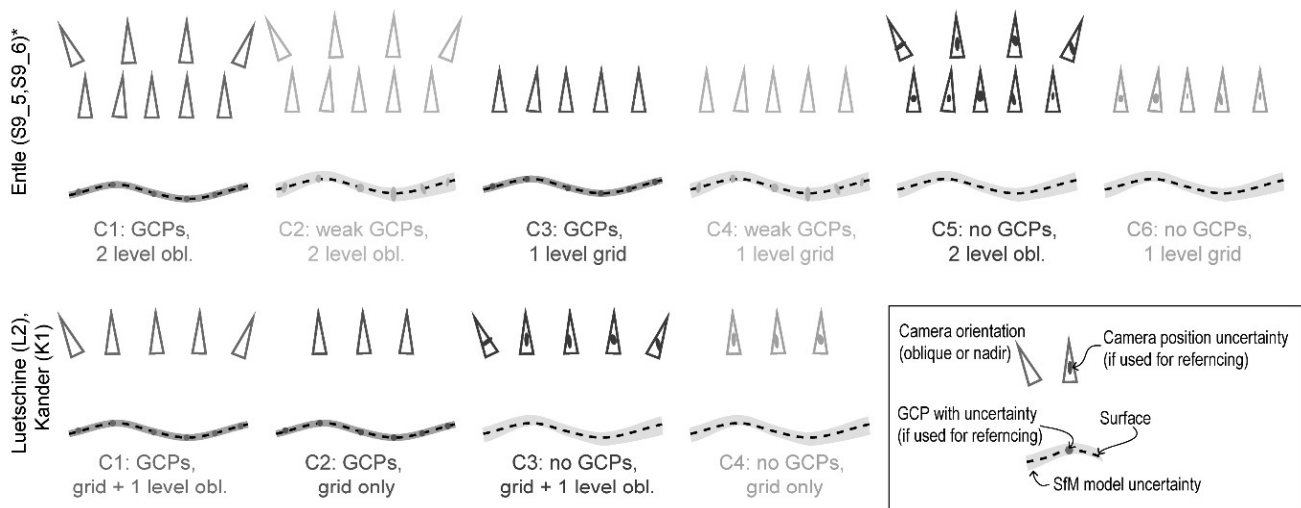

\*two individual UAV surveys conducted with different image acquisition formats

**Figure 2:** Strategies for UAV surveys and Structure from Motion (SfM) model setups (upper row = Entle surveys, lower row = Luetschine and Kander surveys). We used a one-level grid of nadir camera positions as backbone geometry, which we complemented with oblique angle camera positions (James and Robson, 2014). At the Entle (S9), we took nadir images at a second altitude (e.g., Carbonneau et al., 2018). We created different models during processing by first including all images and GCPs (i.e. resulting in models with "C1" labels) and then leaving out the oblique images or the GCPs. For the Entle (S9) models we also tested the option where we used the GCP targets in the images as reference markers only, resulting in two additional models that are labelled with "C2" and "C5". Colours indicate similar model strategies. For flight altitude, nominal camera angles see Table 1. GCPs = ground control points.

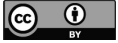

| River<br>(Survey)  | Date           | Net<br>duration<br>(minutes) | Flight<br>height<br>nominal<br>(m) | Camera<br>angle<br>nominal<br>[number of<br>images]<br>(°) | Number<br>of<br>flights | Number<br>of<br>images | Images<br>after<br>QA,<br>[model<br>name] | Image<br>format | Ground<br>sampling<br>distance<br>(mm) | Number<br>of used<br>GCPs |
|--------------------|----------------|------------------------------|------------------------------------|------------------------------------------------------------|-------------------------|------------------------|-------------------------------------------|-----------------|----------------------------------------|---------------------------|
| Kander<br>(K1)     | 06.08.<br>2021 | 50                           | 6                                  | nadir<br>[271],<br>20° [129]                               | 3                       | 401                    | 400                                       | JPEG &<br>DNG   | 1.6                                    | 16                        |
| Luetschine<br>(L2) | 04.05.<br>2021 | 32                           | 5                                  | nadir [64],<br>20° [20+1],<br>50-65° [7]                   | 2                       | 119                    | 95<br>[L2_2],<br>87<br>[L2_1]             | JPEG &<br>DNG   | 1.4                                    | 13                        |
| Entle<br>(S9_5)    | 28.02.<br>2021 | 23                           | 5, 10                              | nadir<br>[217], 25°<br>[24]                                | 2                       | 304                    | 241                                       | DNG             | 1.4                                    | 14                        |
| Entle<br>(S9_6)    | 28.02.<br>2021 | 19                           | 6, 14                              | nadir<br>[251], 25°<br>[16]                                | 1                       | 278                    | 267                                       | JPEG            | 1.6                                    | 10                        |

**Table 1: Summary of the field surveys. QA = quality assessment, GCP = ground control point.**

## 195 2.2 Photogrammetric processing

We generated all topographic SfM models following the same workflow (Fig. 3). We used the Agisoft *Metashape* (v1.6 Pro; formerly *PhotoScan*) software, licensed to the Institute of Geological Sciences, University of Bern. We chose this software because of its wide spread use in geomorphic studies (e.g., Eltner et al., 2016), its well-studied systematics (James et al., 2020 and references therein), and the good agreement of results with those obtained with comparable software packages, e.g., *Pix4D* (Sanz-Ablanedo et al., 2020) or *VMS* (James et al., 2020). We followed the standard bundle adjustment procedure within this software package and refer to see Eltner and Sofia (2020) and James et al. (2019) for principal descriptions and guidelines of such workflows or to Over et al. (2019) for a detailed example. Our model generation (Fig. 3a) always included (i) the manual removal of blurred images, (ii) the selection of the ‘highest quality’ settings within *Metashape* for the initial alignment and (iii) the subsequent filtering of tie point clouds. In general, we used self-referencing and GCPs for the alignment and standard camera modelling, which included all standard parameters for focal length ( $f$ ), radial distortion ( $k_1, k_2, k_3$ ), the offset of the principal point ( $c_x, c_y$ ) and one decentring parameter ( $p_1$ ; we did not include  $p_2$ ). Only when the camera modelling failed, we employed a pre-calibrated normal camera model. For these pre-calibrated camera models, we used the in-built camera calibration routine in *Metashape*, for which we took images of the ‘chessboard’ pattern from different angles with camera distances of 1 to 2 m. For models calibrated with GCP (ground control points), we included 50% of the GCPs for the alignment of the images, and we kept the remaining GCPs as checkpoints. For the ‘weak GCPs’ scenario, we used the GCP targets in an attempt to improve the image alignment without using the information on the position that was independently measured.

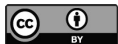

### Workflow and uncertainty quantities

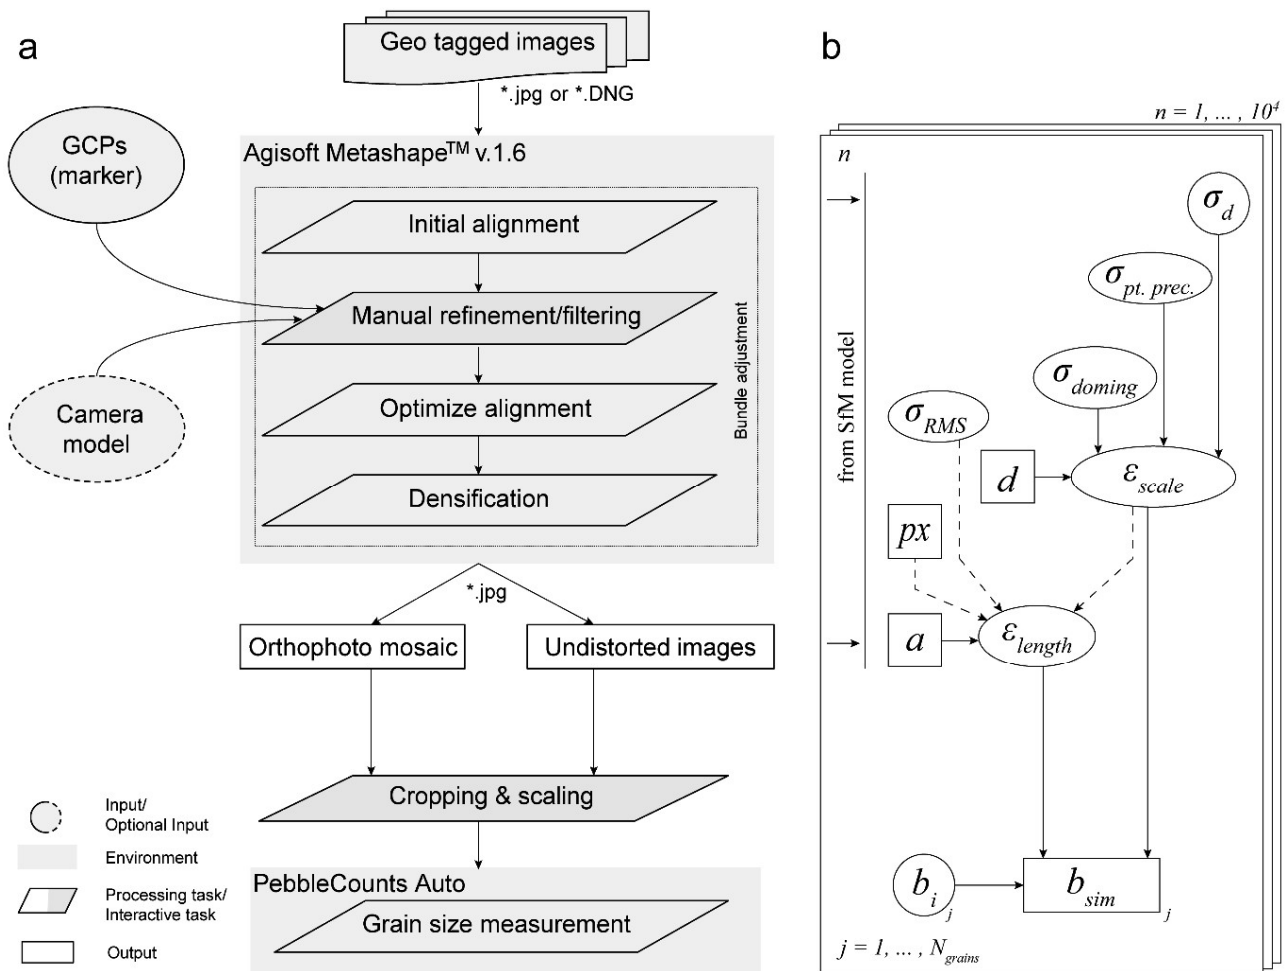

215 **Figure 3:** Workflow for grain size estimations from UAV-derived images. (a) Structure from motion workflow with PebbleCountsAuto (Purinton and Bookhagen, 2019) for grain size estimation. (b) Quantities used for estimating the uncertainty of the grain sizes. Quantities in squares denote image/survey-specific values, while variables in circles/ellipses are represented by a probability density function (pdf). Dashed arrows indicate quantities only used for uncertainty estimation in orthomosaics. For variable explanation, see S2.3 in the main text.

220 We evaluated the accuracy of the SfM model with GCP residuals uncertainty, expressed as root mean square error (RMSE) between measured and estimated checkpoints. For the calculation of both horizontal (x,y direction) and vertical (z direction) RMSE values we used the program *Metashape*. To assess the model precision, we used the method (and the python script) of James et al. (2020) to export and evaluate the sparse point cloud precision from *Metashape*, which uses *Metashape*'s sparse point coordinate variance as estimates for the precision of oriented and scaled point coordinates. Furthermore, we determined the systematic uncertainty ('doming') with the method of James et al. (2020) and report amplitudes of the modelled doming



225 in the z direction, which are calculated over horizontal distances of 20 m (K1), 12 m (L2), 30 m (S9\_5) and 20 m (S9\_6), in Sect. 3.

For each generated model, we produced dense point clouds and orthophoto mosaics. This densification was done with the ‘high quality’ and ‘mild depth filtering’ settings. The subsequent orthophoto mosaic generation was accomplished using the ‘hole filling’ option and default blending (‘Mosaic’) in *Metashape*. Orthophoto mosaics were generated with a pixel  
230 resolution of 1 mm and were cut with the corresponding camera footprint. We also exported single images, which were undistorted by using the specific camera model from the photogrammetric alignment. We further estimated the camera height for these images as distance of the camera centre to the corresponding centre points on the images using Euclidian distances. All imageries (both orthophoto mosaics and single images) were exported from *Metashape* as JPEG file, with initial DNG images that were converted by using the camera white balance. For each study site, we selected specific areas,  
235 representing model regions with low and high model confidence (i.e., regions A and B hereafter), for which we then finally determined the grain size distributions.

### 2.3 Grain size measurements

We measured grain sizes automatically on all processed images with the open-source and python-based *PebbleCounts* (i.e., *PebbleCountsAuto*) software of Purinton and Bookhagen (2019). We employed this software package because of two  
240 reasons, namely that it yields sizes for individual grain instances and that it allows measuring large numbers of grains in an automated way. First, only the measurement of individual grain instances (which means that each grain is identified, delineated and recorded) allows to propagate specific uncertainty quantities (see Sect. 2.4 below, Fig. 3) from UAV surveys to grain size data. This prohibits the use of texture-based approaches *sensu latu*, e.g., *DGS* (Buscombe, 2013), *SediNet* (Buscombe, 2019), *GrainNet* (Lang et al., 2021) among others, to measure grain sizes for the purpose of this study. Second,  
245 other segmentation-based approaches, e.g., *Basegrain* (Detert and Weitbrecht, 2012) or manual segmentation (Sulaiman, 2014), require manual processing of each image and are therefore not suitable for the large number of processed images as is the case in this study. We acknowledge that there are known shortcomings of *PebbleCounts*, and we refer to Chardon et al. (2021) for a comparison with other software results, and to Purinton and Bookhagen (2021) for mitigation strategies of some shortcomings.

250 In detail, this program segments images and subsequently fits ellipsoids around detected instances of grains, thereby recording the lengths of the a- and b-axes of these ellipsoids, of which we report the b-axis values throughout the study for simplicity purposes. Key software input parameters were an ‘otsu\_threshold’ of 50 and ‘first\_nl\_denoise’ of 2, and no sand or vegetation mask was used (for further details we refer to Burinton and Bookhagen, 2019). A detection limit of a minimum of 12 pixels for a grain and the default of 30% as a maximum misfit were kept constant for all measurements. This results in  
255 a minimum detection threshold for grains (i.e., a cut-off) that is image specific. For the processed images, this threshold lies around 18 mm given the image pixel resolutions of c. 1.5 mm px<sup>-1</sup>. The image resolution, and thus the scale of single images, was estimated individually for undistorted and scaled single images. To do so, we applied the *calculate\_camera\_resolution*



script of Purinton and Bookhagen (2019) together with the camera model parameters and the camera distance estimation from the corresponding SfM model. For orthophoto mosaics the resolution was up-sampled to 1 mm px<sup>-1</sup>. We cut all grain size data below 18 mm to achieve comparable data sets.

For the Kander survey (K1) we additionally measured the b-axis of 250 grains with the approach of Wolman (1954), thereby using a household calliper and a measuring tape. This data was collected as ground truth to compare grain size data measured in the UAV imagery. Yellow rulers in Figure 4 indicate the area where grain sizes were manually measured.

#### 2.4 Uncertainty estimation

For uncertainty estimation, we used a combined bootstrapping and Monte Carlo modelling approach. We first statistically resampled each grain size distribution (GSD) through random resampling with replacement, i.e. through bootstrapping. We applied 10<sup>4</sup> iterations to estimate the effect of the sample size. We modelled the uncertainty of each b-axis within these resampled GSD by using uncertainty metrics from the SfM models (Fig. 3b; see also Sect. 2.2), thereby considering that:

$$b_{sim} = (b_i \pm \varepsilon_{length}) * \varepsilon_{scale}. \quad (1)$$

Here,  $b_i$  is a randomly resampled  $b$ -axis value from the measured grain size distribution,  $\varepsilon_{length}$  represents a measurement error on the axis length. This error depends on the resolution of the final images that are used for segmentation.  $\varepsilon_{scale}$  includes the systematic errors, the precision and the accuracy related to the SfM model. The  $\varepsilon_{length}$ -term for single images is determined by the resolution of  $2a\sqrt{2}$ , where  $a$  is the average pixel length. To achieve a randomization in the single image data, we parametrized  $\varepsilon_{length}$  as normal distribution with  $2a\sqrt{2}$  as one standard deviation. For the orthophoto mosaics, we employed the same approach to quantify the measurement errors. However, due to the nature of being a mosaic, an additional error that is sourced in the image alignment might arise since we cannot assume that each pixel is in its correct position in relation to its neighbour. Therefore, we additionally used the average pixel error of the model ( $px$ ), estimated from GCP checkpoints (Table S2):

$$\varepsilon_{length} = 2a\sqrt{2} * px \quad (2)$$

We consider this average pixel error as normally distributed and used the RMS re-projection error ( $\sigma_{RMS}$ ) as one standard deviation upon randomization.

The  $\varepsilon_{scale}$  factor, which accounts for the SfM model accuracy, precision and systematic error (‘doming’), consists of three scaling components. This is parametrized as

$$\varepsilon_{scale} = 1 * \frac{\sigma_d + \sigma_{pt. prec.} + \sigma_{doming}}{d}. \quad (3)$$

Generally, the scale of orthoimages is controlled by the distance between the camera and the ground ( $d$ ) and the uncertainty associated with this distance. For single images, we estimated the individual camera distance by taking the mean distance in  $z$  direction to the 100 sparse cloud points that are closest to the camera center point. We used a python script (Supporting information Code S1) for this selection. For randomization, we used this mean as  $d$  and its standard deviation as  $\sigma_d$ . For

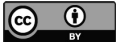

290 orthophoto mosaics, we used the mean distance of all cameras and the associated standard deviation, respectively. We did so  
to be conservative and to account for differences between the observation distances of several cameras. We used the mean  
value of the point cloud precisions in z direction over the whole survey. We determined this value with the method of James  
et al. (2020), and we considered it as standard deviation of a normal distribution to randomize  $\sigma_{pt. prec.}$ , both for single  
images and orthomosaics. Finally, we considered the effects related to the systematic errors through the use of half of the  
doming amplitude in z direction, which we fitted with the method of James et al. (2020). We used this value as standard  
295 deviation for a uniform distribution for  $\sigma_{doming}$ , both for single images and orthomosaics. We implemented a randomization  
of these components through truncated normal distributions to avoid ending up with grains that are smaller than the detection  
limit or the negative length values.

From the randomized grain size distribution (GSD), we calculated percentile values for grain sizes. Accordingly, for each  
grain size percentile such as the D50, D84, and others, we report the median percentile along with percentiles 2.5 and 97.5  
300 across the  $10^4$  GSDs, which represents the 95% confidence interval of the respective percentile.

### 3 Results

In this section, we first present the results of the UAV field surveys, before proceeding to the results of the photogrammetric  
models. Finally, we present grain size results, both for full grain size distributions and for key percentile values, and results  
of field measurements.

#### 305 3.1 UAV surveys and imagery

The field surveys were successfully completed under sunny and calm (Kander), overcast and turbulent (Luetschine) and  
rapidly changing weather conditions (Entle). Difficult flying conditions (changing light and wind) decreased the image  
quality, which contributed to the need to exclude a significant number of images for the Luetschine (up to 27%) and Entle  
(up to 20%) surveys (Table 1). The excluded images were mostly from the boundaries of the survey areas. For the Entle site  
310 we removed nadir images taken from the higher altitude, and for the Luetschine reach we excluded images that were  
acquired with strongly oblique view angles ( $>50^\circ$ ). Noteworthy, most of them were taken during manual flight and, for the  
Entle case, from the higher altitude level. Removing these images was necessary for a successful image matching during the  
photogrammetric alignment.

The obtained UAV images displayed a range of differences in image content and light conditions (Fig. 4). Sunny situations  
315 result in more interstitial shadows (K1, S9), while overcast conditions with changing light led to occasional overexposure  
(L2). Of note here is site S9, which features more sandy areas than the other sites. Generally, UAV on-board image  
corrections tend to yield a higher saturation and contrast in the resulting imagery, which was persistent after  
photogrammetric processing (Fig. 4).

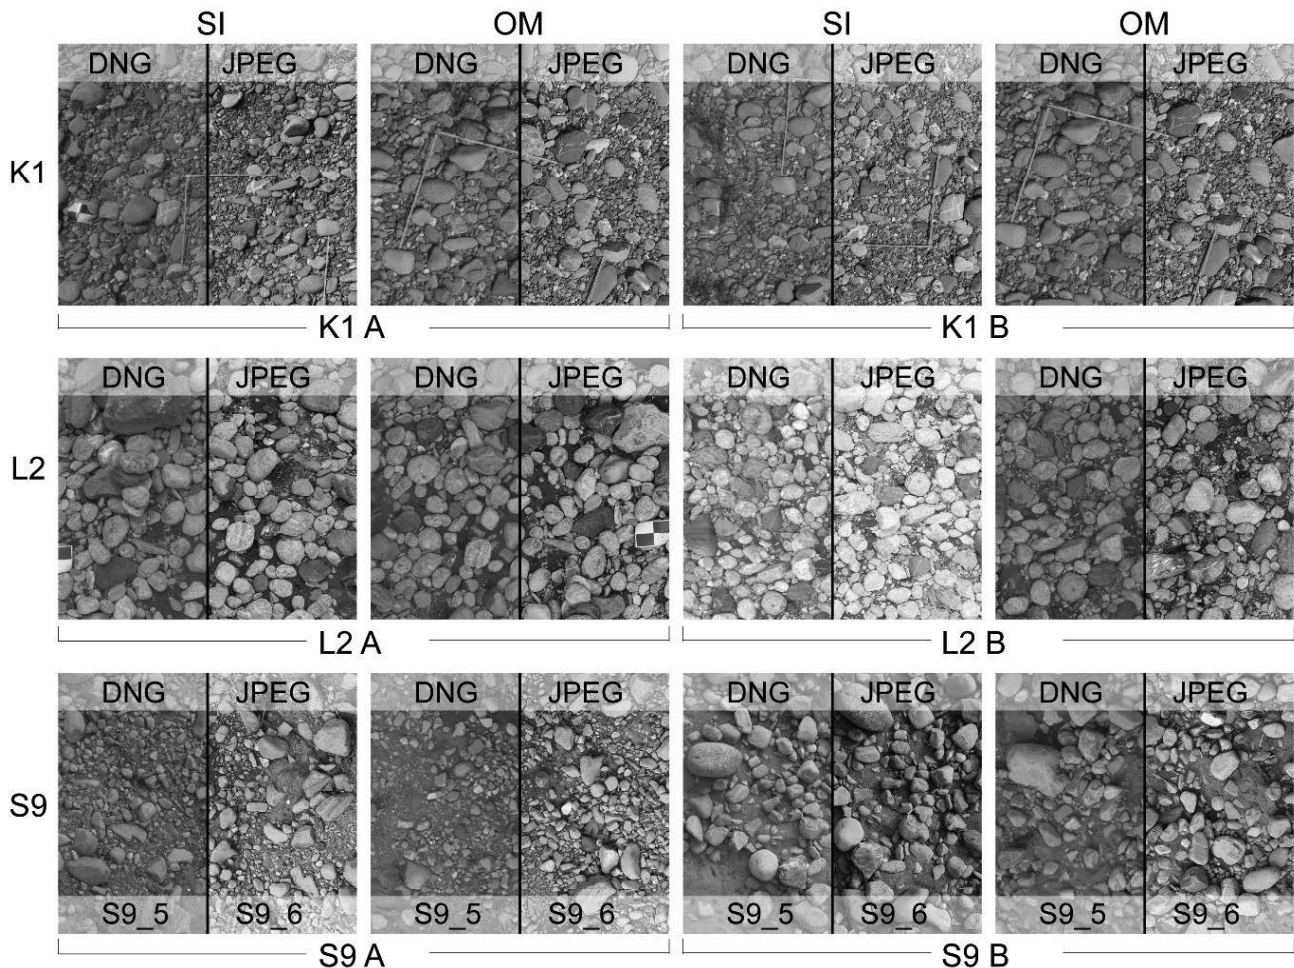

320 **Figure 4:** UAV imagery results illustrated by a selected range of images, for both image acquisition formats (JPEG and DNG) that we  
 used for grain size estimation. The photos showcase survey-specific image conditions, e.g., shadows, exposure, saturation and contrast as  
 well as site specific variations, e.g. grain shape, colour or sand content. Please note that all these images, not only orthophoto mosaics  
 (OM), are results that were achieved after photogrammetric processing, i.e. single images (SI) are undistorted with a camera model. All  
 images in this figure were extracted from SfM models, which include GCPs and oblique camera angles in the bundle adjustment.  
 325 Furthermore, these images only show parts of the corresponding images that were used for grain size estimation. For location reference,  
 see Fig. 1.

### 3.2 Topographic models

In total, we produced 28 topographic models with the SfM approach. For all sites, the resulting models show large variations  
 (Table 2) in absolute accuracies, sparse point cloud precisions and systematic errors ('doming'). Vertical accuracy ( $RMSE_z$ ,  
 330 estimated for checkpoints only) ranges from 5.4 cm to 5.6 m for the K1 survey, from 1.8 cm to 63 m for the L2 survey and  
 from 3.9 cm to >200 m for the S9 surveys. Horizontal accuracy ( $RMSE_{x,y}$ ) ranges from 0.9 cm to 2.4 m for K1 models, from  
 2.1 cm to 2.2 m for the L2 models and from 3.3 cm to 4.9 m for S9 models. All model accuracy metrics can be found in



Table S2. Model precision errors estimated from the sparse point clouds are generally highest in the vertical z-direction (see Table S3 for precision of all results), and therefore, precision estimates are only presented here for the z direction (Table 2).  
 335 Precision ranges from 0.4 cm to 0.4 m for K1 models, from 1 cm to 1 m for L2 models and 1 cm to 0.7 m for S9 models, spanning a range of up to two orders of magnitude. Systematic errors estimated from GCP residuals and expressed as doming amplitudes in z direction ranges from 3 cm to 0.9 m for K1 models, from 5 cm to 1.1 m for L2 models, and from 3 cm to 3.1 m for S9 models.

In general, the uncertainty is smallest across all metrics for model setups for surveys that included GCPs and oblique camera angles (C1 suffix for all surveys). The only exceptions are those models where GCPs and only grid-aligned cameras were used (C2 suffix for K1, L2 surveys and C3 suffix for S9 surveys), thereby resulting in a sometimes slightly higher point precision (Table 2). Overall, models with no GCPs, and where cameras were only orientated in a grid fashion (suffix C4 for K1 and L2 surveys, and suffix C6 for S9 surveys), produce the highest uncertainties across all metrics. Models that are based on raw format images (K1\_1, L2\_1 and S9\_5 models) yield overall smaller uncertainties for all metrics than models where the UAV on-board pre-processed JPEG images were used (K1\_2, L2\_2, S9\_6 models). Only for L2 JPEG models with GCPs (L2\_2\_C1, \_C2) the RMSE and vertical precision values are slightly smaller than or similar to the related values of comparable DNG models (L2\_1\_C1, \_C2).  
 345

| Model                         | Check point accuracy        |                           | Point precision | Doming/<br>Bowling<br>amplitude<br>(m) | Model                    | Check point accuracy        |                           | Point precision | Doming/<br>Bowling<br>amplitude<br>(m) |
|-------------------------------|-----------------------------|---------------------------|-----------------|----------------------------------------|--------------------------|-----------------------------|---------------------------|-----------------|----------------------------------------|
|                               | RMSE <sub>x,y</sub><br>(mm) | RMSE <sub>z</sub><br>(mm) | z Mean<br>(mm)  |                                        |                          | RMSE <sub>x,y</sub><br>(mm) | RMSE <sub>z</sub><br>(mm) | z Mean<br>(mm)  |                                        |
| <i>Raw (DNG) image format</i> |                             |                           |                 |                                        | <i>JPEG image format</i> |                             |                           |                 |                                        |
| K1_1_C1                       | 13                          | 54                        | 6               | 0.027                                  | K1_2_C1                  | 9                           | 106                       | 10              | 0.460                                  |
| K1_1_C2                       | 15                          | 66                        | 4               | -0.081                                 | K1_2_C2                  | 18                          | 186                       | 9               | -0.618                                 |
| K1_1_C3                       | 1035                        | 967                       | 167             | -0.020                                 | K1_2_C3                  | 1719                        | 5289                      | 276             | 0.496                                  |
| K1_1_C4                       | 2129                        | 4275                      | 170             | -0.136                                 | K1_2_C4                  | 2389                        | 5592                      | 402             | -0.894                                 |
| L2_1_C1                       | 24                          | 22                        | 10              | -0.047                                 | L2_2_C1                  | 21                          | 18                        | 10              | 0.083                                  |
| L2_1_C2                       | 41                          | 51                        | 20              | 0.152                                  | L2_2_C2*                 | 25                          | 82                        | 13              | -0.135                                 |
| L2_1_C3                       | 1854                        | 7.E+04                    | 978             | -0.106                                 | L2_2_C3                  | 1854                        | 7.E+04                    | 650             | 0.165                                  |
| L2_1_C4                       | 2033                        | 7.E+04                    | 972             | 0.403                                  | L2_2_C4*                 | 2127                        | 7.E+04                    | 730             | 1.050                                  |
| S9_5_C1                       | 64                          | 39                        | 13              | 0.050                                  | S9_6_C1                  | 40                          | 143                       | 21              | 0.033                                  |
| S9_5_C2                       | 1555                        | 2.E+05                    | 205             | 1.538                                  | S9_6_C2                  | 4565                        | 2.E+05                    | 654             | 3.589                                  |
| S9_5_C3*                      | 57                          | 211                       | 9               | -0.780                                 | S9_6_C3*                 | 33                          | 214                       | 12              | -0.535                                 |
| S9_5_C4                       | 1700                        | 2.E+05                    | 221             | -0.256                                 | S9_6_C4*                 | 4762                        | 2.E+05                    | 197             | -0.486                                 |
| S9_5_C5                       | 1556                        | 2.E+05                    | 202             | 1.528                                  | S9_6_C5                  | 4566                        | 2.E+05                    | 640             | 3.105                                  |
| S9_5_C6                       | 1699                        | 2.E+05                    | 219             | 0.970                                  | S9_6_C6*                 | 4917                        | 2.E+05                    | 215             | -0.546                                 |

**Table 2: Summary of topographic model uncertainty (i.e., SfM model quality). Colours indicate model setup (Fig. 2 serves as legend). An \* indicates models with pre-calibrated camera models.**





### 350 3.3 Grain size distributions

Here we report the results of our grain size measurements from images as grain size distributions (GSD) and the respective modelled uncertainties, which encompass both statistical uncertainties and errors introduced by topographic models. We successfully measured grain sizes of pebbles from all 28 SfM models, resulting in 112 complete GSDs (for each topographic model we measured in two regions, both in single images and orthophoto mosaics, respectively) with b-axes that range in size from the cut-off of 18 mm to > 35 cm. The number of identified grains ranges for the Kander survey (K1) from 902 to 1600 (single images; SI) and 353 to 1142 (orthophoto mosaics; OM), for the Luetschine survey (L2) from 130 to 633 (SI) and 136 to 570 (OM), and for the Entle surveys (S9) from 333 to 1451 (SI) and 160 to 1058 (OM). In all surveys and in most cases, more grains are recovered after segmentation in single images compared to the number of grains found in orthophoto mosaics (Table S4; see also Figs. 5 and 6). Grain size distributions with uncertainties for each percentile can successfully be modelled with the bootstrapping and MC approach for all models (e.g., Figs. 5 and 6). The difference between the median of all photo-measured and all modelled percentiles ranges from 2.0 to 3.5% (SI) and 2.5 to 5.7% (OM) for survey K1, from 0.9 to 3.6% (SI) and 1.4 to 4.1% (OM) for survey L2, and from 0.9 to 8.9% (SI) and 2.6 to 9.2% (OM) for both S9 surveys. These values are relative to the photo-measured percentile values. We note that even the maximum difference between the photo-measured percentiles and the modelled median for the percentiles is generally <10% for most percentiles. The only exceptions are some models of K1\_2 (SI: 11 to 17%), L2\_1 (SI: 25 to 47%; OM: 10 to 16%) and L2\_2 (SI: 31 to 36%; OM: 11 to 20%; see Table S4 for all results). Therefore, recovered grain size distributions from imagery are internally consistent within the modelled 95% CI (confidence interval) for each percentile and for all topographic models (e.g., Figs. 5 and 6), despite some variations in magnitude of uncertainty and a varying degree of agreement across models within surveys.

The magnitude of grain size uncertainty varies for surveys and the orthoimage format used for grain size measurements. Generally, the modelled percentile uncertainty, i.e., the modelled 95% confidence interval (CI), is smaller for all GSDs from imagery of the K1 survey (e.g., Figs. 5a to d) than for GSDs from the L2 survey (e.g., 5e to h). A similar trend of survey specific grain size uncertainty is also visible when comparing results from S9\_5 (Figs. 6a, b) to data from S9\_6 (Figs. 6c, d). This is also observable in the CI as relative uncertainty, which varies from 6.5 to 9.4% (SI) and 7.7 to 15% (OM; Figs. 5b, d) for K1. Similarly, albeit with a generally larger magnitude, the modelled percentile uncertainty for L2 spans from 15.6 to 41.5% (SI) and 15.6 to 37.2% (OM), whereas it ranges from 7.6 to 21% (SI) and 8.2 to 28.7% (OM) for the S9 surveys. However and importantly, the agreement of data from models within a survey (i.e., C1 to C6; see Sect. 2.2 for details) is higher for grains measured in single images (e.g., Figs. 5a, c, e, g and Figs. 6a, c), compared to grains measured in their orthomosaic counterparts (e.g., Figs 5b, d, f, h and Figs. 6b, d).

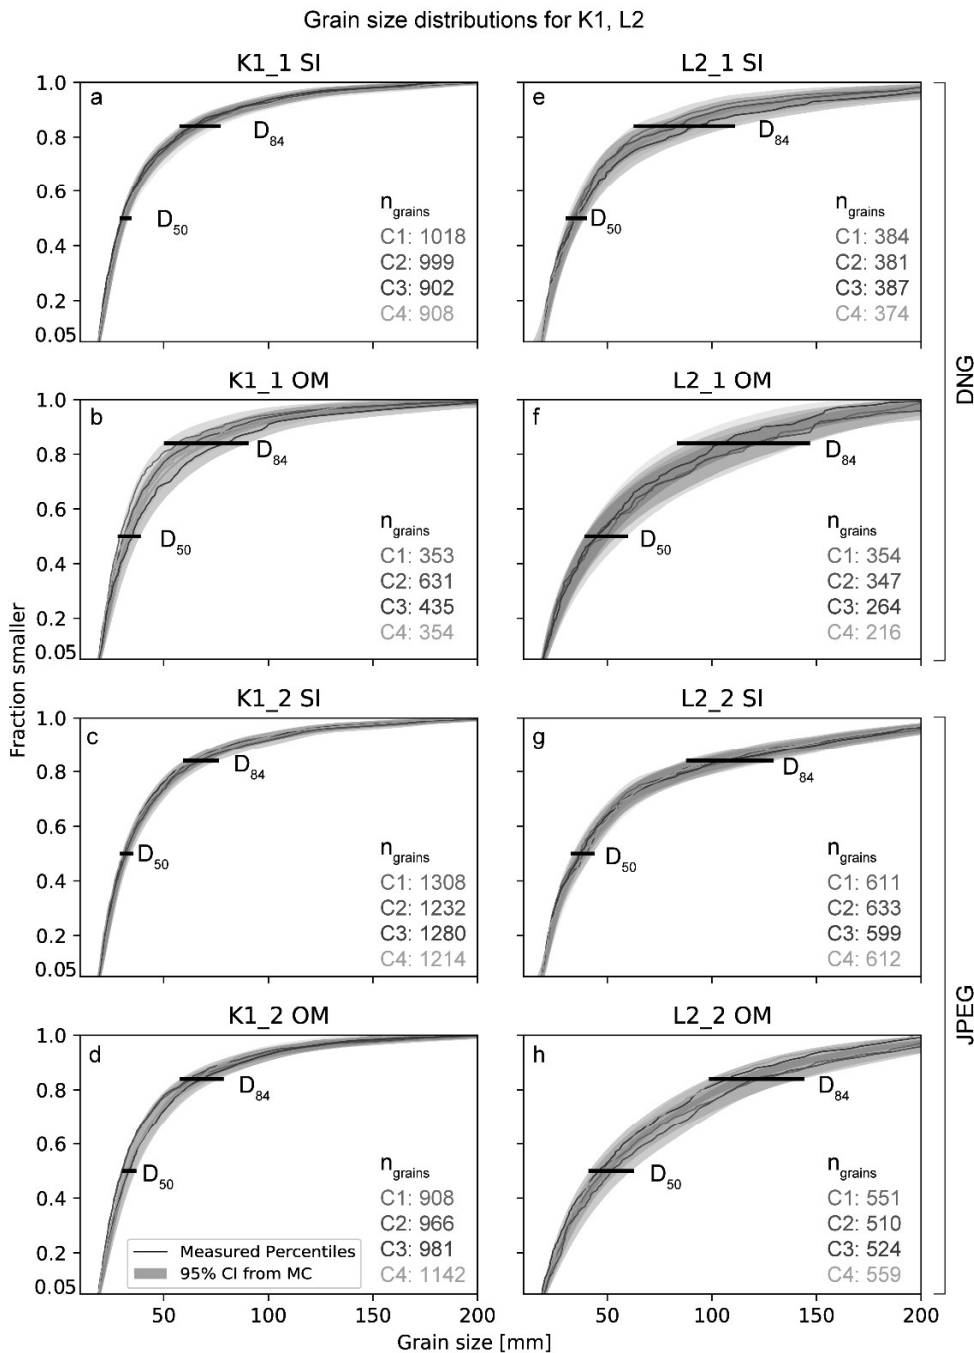

380 **Figure 5:** Selected grain size (i.e., b-axis length) distributions measured in different images (SI = single orthoimage, OM = orthophoto mosaic) from various UAV models (see Fig. 2 for model characteristics and colour legend) with the modelled 95% confidence interval (CI) for each percentile. All Kander (K1) data (a-d) in this figure refer to the region A, while all Luetschine (L2) data (e-h) correspond to the respective region B (see Fig. 1 for location). DNG = raw image acquisition format, JPEG = JPEG image acquisition format;  $D_{50}$ ,  $D_{84}$  = Percentiles 50 and 84, respectively;  $n_{\text{grains}}$  = Number of segmented grains.

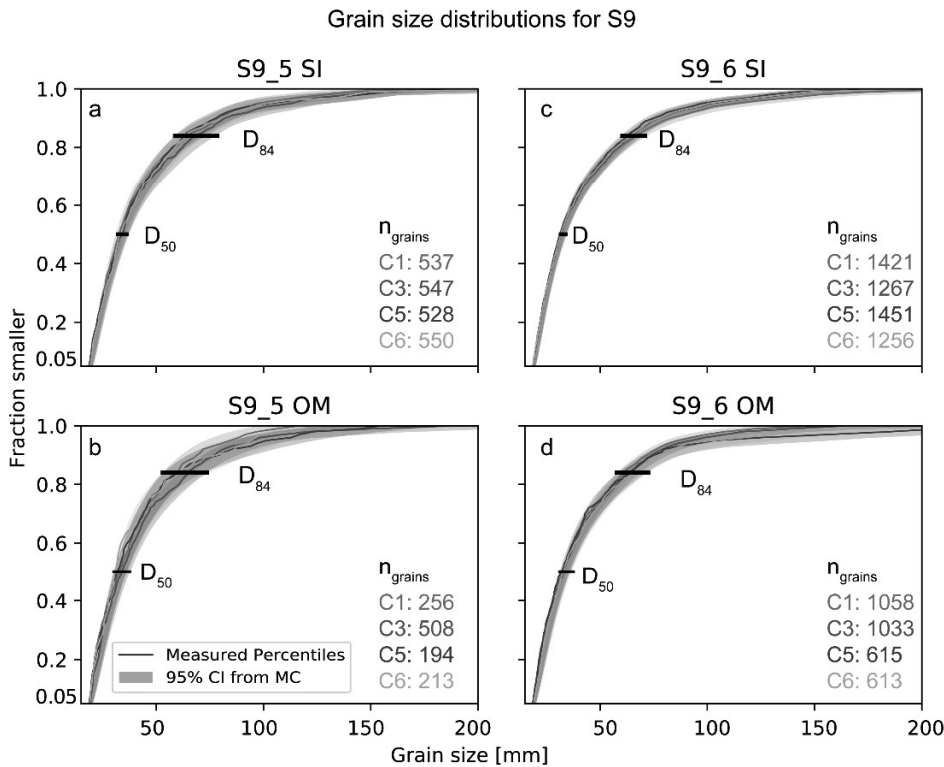

385

**Figure 6:** Grain size distributions and percentile uncertainty (modelled 95% confidence interval; CI) for the Entle surveys (S9) for different UAV imagery (SI = single orthoimage, OM = orthophoto mosaic; see Fig. 2 for model characteristics and colour legend). All data refer to the region A (see Fig. 1 for location). D<sub>50</sub>, D<sub>84</sub> = Percentiles 50 and 84, respectively; n<sub>grains</sub> = Number of segmented grains. Please note that S9\_5 (a, b) was acquired in raw image format (DNG) while S9\_5 images (c, d) were acquired as JPEG images.

### 390 3.4 Key grain size percentiles

Overall, modelled percentile medians for commonly used percentile values, i.e., D<sub>50</sub>, D<sub>84</sub> and D<sub>96</sub>, are in agreement with the photo-measured percentile values for all results and averaged across all models (Table 3; see Table S5 for more details). However, the modelled estimations for the D<sub>50</sub>, D<sub>84</sub> and D<sub>96</sub>, and their respective uncertainties, here reported for a 95% CI, vary considerably between individual surveys (Table 3), regions within surveys (Fig. 7), and the format of the images that are used for measuring the grain sizes (Fig. 8).

395

For all grain sizes measured in the K1 survey the mean D<sub>50</sub> with  $(3.1 - 3.2) \pm (0.1 - 0.2)$  cm, the median D<sub>84</sub> with  $(6.6 - 6.9) \pm (0.6 - 0.8)$  cm and the median D<sub>96</sub> with  $(12.1 - 13.8) \pm (1.4 - 1.9)$  cm are consistent and in close agreement (Table 3). This is true irrespective of the image region (Figs. 7a, b), the image format used for grain size measurement or the UAV image acquisition format (Figs. 8a, b). Percentiles from the L2 survey, e.g., the D<sub>50</sub> with  $4.7 \pm (0.6 - 0.8)$  cm for region A and with  $(3.7 - 3.9) \pm (0.3 - 0.4)$  cm for region B, are consistent within regions (Table 3). However, the modelled uncertainties are too large to establish differences in percentiles between regions (e.g., Figs 7c, d), or between model reference strategies, UAV

400



405

image acquisition formats or between imagery formats (Figs. 8c, d). For percentiles from data for the S9 surveys, the situation is different. Here, key percentile values are only agreeing within regions when extracted from single images (Figs. 7e, g), e.g., yielding a clearly distinguishable  $D_{50}$  of  $3.4 \pm 0.2$  cm for region A and  $4.1 \pm 0.4$  cm for region B. Thus, the averaged percentile values from orthomosaics (Table 3) would yield biased information, effectively prohibiting a distinction of different grain size signals of the regions (Figs. 7f, h). A closer inspection reveals that within the data from orthomosaics only imagery from SfM models, referenced without GCPs (i.e., C5 and C6; see also Fig. 2), and for one single region (B), is responsible for the inconsistent data.

| <i>D</i> | <i>Grain size region</i> | <i>Single Images (SI)</i> |                    |                         |                                  | <i>Orthoimage mosaics (OM)</i> |                    |                         |                                  |
|----------|--------------------------|---------------------------|--------------------|-------------------------|----------------------------------|--------------------------------|--------------------|-------------------------|----------------------------------|
|          |                          | <i>median D (mm)</i>      | <i>mean D (mm)</i> | <i>mean 95% CI (mm)</i> | <i>relative. Uncertainty (%)</i> | <i>median D (mm)</i>           | <i>mean D (mm)</i> | <i>mean 95% CI (mm)</i> | <i>relative. Uncertainty (%)</i> |
| D50      | K1 A                     | 32                        | 31                 | 3                       | 8                                | 33                             | 32                 | 4                       | 11                               |
|          | K1 B                     | 32                        | 31                 | 2                       | 8                                | 32                             | 31                 | 3                       | 11                               |
| D84      | K1 A                     | 65                        | 66                 | 11                      | 16                               | 67                             | 66                 | 15                      | 22                               |
|          | K1 B                     | 70                        | 69                 | 11                      | 16                               | 68                             | 67                 | 14                      | 21                               |
| D96      | K1 A                     | 122                       | 121                | 28                      | 23                               | 121                            | 123                | 38                      | 31                               |
|          | K1 B                     | 137                       | 138                | 35                      | 25                               | 122                            | 125                | 37                      | 30                               |
| D50      | L2 A                     | 48                        | 47                 | 15                      | 32                               | 47                             | 47                 | 12                      | 26                               |
|          | L2 B                     | 36                        | 37                 | 6                       | 17                               | 39                             | 39                 | 8                       | 20                               |
| D84      | L2 A                     | 119                       | 120                | 41                      | 35                               | 115                            | 113                | 31                      | 27                               |
|          | L2 B                     | 98                        | 95                 | 30                      | 31                               | 93                             | 94                 | 26                      | 28                               |
| D96      | L2 A                     | 202                       | 197                | 79                      | 39                               | 179                            | 178                | 51                      | 29                               |
|          | L2 B                     | 195                       | 184                | 61                      | 31                               | 171                            | 164                | 53                      | 31                               |
| D50      | S9 A                     | 34                        | 33                 | 3                       | 10                               | 34                             | 32                 | 4                       | 13                               |
|          | S9 B                     | 41                        | 40                 | 8                       | 20                               | 36                             | 35                 | 8                       | 22                               |
| D84      | S9 A                     | 67                        | 66                 | 10                      | 15                               | 64                             | 63                 | 13                      | 20                               |
|          | S9 B                     | 109                       | 107                | 26                      | 24                               | 83                             | 83                 | 27                      | 32                               |
| D96      | S9 A                     | 114                       | 114                | 32                      | 28                               | 103                            | 104                | 33                      | 32                               |
|          | S9 B                     | 185                       | 183                | 52                      | 28                               | 138                            | 143                | 52                      | 37                               |

**Table 3: Key modelled percentile results (i.e.,  $D_{50}$ ,  $D_{84}$  and  $D_{96}$ ) averaged over all models for each grain size region.**

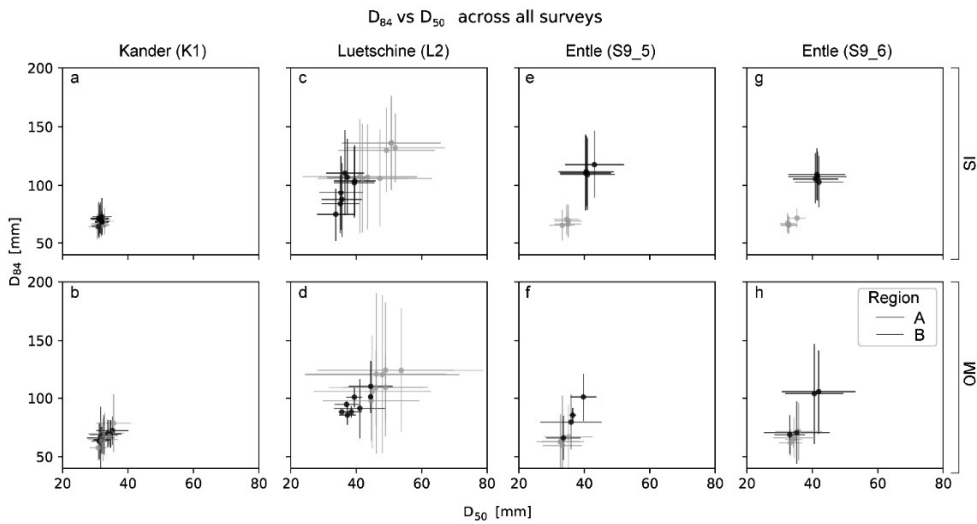

410

**Figure 7:** Modelled median grain size percentile  $D_{50}$  plotted against the  $D_{84}$  for all surveys: Kander (a, b), Luetschine (c, d), Entle (e-h) and regions of grain size sampling (A and B). For locations of the regions, see Fig. 1. OM = orthophoto mosaics, SI = single images.

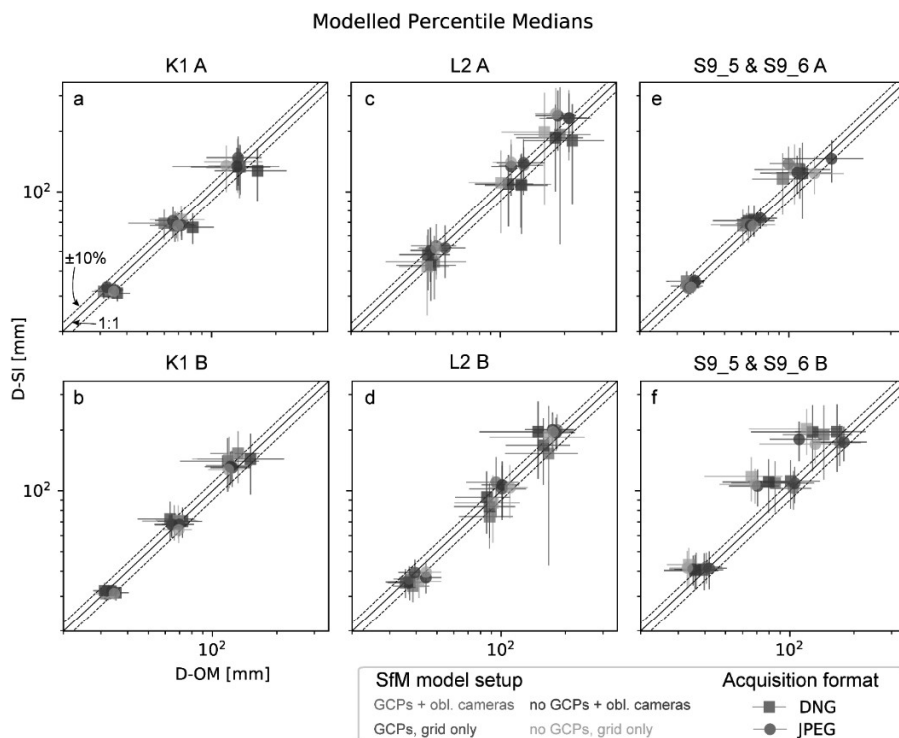

415

**Figure 8:** Modelled median values for percentiles  $D_{50}$ ,  $D_{84}$  and  $D_{96}$  from single orthoimages (SI) and orthophoto mosaics (OM) for selected regions of the survey sites. Different SfM model setups are colour-coded, please see Fig. 2 for detailed legend. Displayed uncertainties represent modelled 95% confidence intervals. Please note the logarithmic scale.



### 3.5 Field measurements at the Kander site (K1)

The manual measurements of grains sizes  $>1.8$  cm in the field with the Wolman method yielded 224 b-axis values for K1. The resulting key percentile lengths are 2.8 cm ( $D_{50}$ ), 5.3 cm ( $D_{84}$ ) and 10.2 cm ( $D_{96}$ ). For direct comparison, we measured  
420 grain sizes in cropped subsections of all K1 imagery, which returned 162 to 302 (SI) and 189 to 486 (OM) grains. The median of the relative percentile uncertainty (95% CI) ranged from 14.4 to 19.5% (SI) and from 12.7 to 21.9% (OM). Mean modelled key percentile values ranged between  $3.0 \pm 0.3$  cm (SI; rel. 16 - 17%) and  $3.2 \pm 0.3$  cm (OM; rel. 16 - 17%) for the  $D_{50}$ . The mean modelled ranged  $D_{84}$  between  $(5.9 - 6.1) \pm (1.0 - 1.1)$  cm (SI; rel. 33 - 36%) and  $(6.5 - 6.7) \pm (1.0 - 1.1)$  cm (OM; rel. 30 - 31%), while the mean modelled  $D_{96}$  ranged between  $(11.6 - 12.2) \pm (3.0 - 3.4)$  cm (SI; rel. 48 - 57%) and  
425  $(11.5 - 12.0) \pm (2.4 - 2.8)$  cm (OM; rel. 42 - 45%). These values are in good agreement with modelled results for whole regions (see Sect. 3.4 above and Table 3).

## 4 Discussion

Measurements of grain sizes in imageries obtained by an UAV need to be accompanied by a photogrammetric processing of the imageries to correct for camera lens distortion and to reference the images. Therefore, we begin by discussing the quality  
430 of our models and UAV imagery, as well as the conditions encountered in the field. We emphasize here that the aim of this study is not to optimise or review UAV strategies or SfM processing, thus, we restrict ourselves to report only noteworthy observations and their implications in Sect. 4.1. For more in depth discussions of UAV and SfM workflows, we refer to the dedicated literature (e.g., James et al., 2017b; O'Connor et al., 2017; Carbonneau and Dietrich, 2017; Eltner and Sofia, 2020, James et al., 2020). Then we focus on the process for measuring grain sizes and for modelling the uncertainties. Finally, we  
435 compare the results where grains were measured on images and in the field with the Wolman (1954) method. We then end with a discussion of how grain size data and their uncertainty depend on the various processing steps from UAV image acquisition to estimates of percentile values.

### 4.1 UAV imagery and SfM model quality

We successfully created topographic models from the image sets collected at the three survey sites. The topographic models  
440 are generally better for the Kander (K1) survey compared to the Luetschine (L2) and Entle (S9) surveys (Table 1) as comparatively fewer K1 images had to be excluded from the photogrammetric processing due to poor image quality (e.g., overexposure, blurred photos etc., as explained above). We attribute this to the better light and flight conditions (i.e., constantly sunny and weak wind), to lower RTK GNSS (real-time kinematic positioning for global navigation satellite systems) uncertainties and the more favourable angle and distribution of oblique camera positions (i.e., oblique cameras at  
445 the same altitude as the nadir positions and with an angle of  $20^\circ$ ). In our specific case, vegetation seemed to have a lower impact on the precision of the SfM model quality, since the site K1 was characterized by the highest vegetation density on the bar (Fig. 1), yet the resulting models had the overall highest quality for all metrics. However, our different referencing



strategies (Fig. 2) allowed us to create topographic models with varying precision, accuracy and systematic errors for all surveys (Table 2), in which we find some noteworthy SfM characteristics.

450 First, some SfM models (see Table 2) failed to successfully reference the images, i.e., they specifically failed to model the camera lens, thereby yielding completely wrong focal length estimations (>50% rel. difference), which then resulted in camera altitudes that were > 50% lower than the actual flight altitude. This occurred only in models with one flight level, a gridded flight-path and no oblique angle camera positions. We do not find this outcome as surprising, because such a condition produces the weakest network geometry, even if GCPs are included in the surveys (i.e., S9\_5\_C3 and S9\_6\_C3; 455 see also James et al., 2017b; 2020). Interestingly, significantly more camera models failed for those surveys where the images were acquired in the JPEG format than compared to those models that base on images in the DNG format (5 compared to 1). We suspect that this is a consequence of the UAV on-board pre-processing of images with a generic camera model, which results in camera modelling failure during the bundle adjustment (for a detailed discussion see James et al., 2020).

460 Second, surveys where images were referenced with GCPs, and where images taken with oblique camera positions were included, produced the most accurate and most precise models (see Fig. 2 and Table 2). In contrast, surveys without GCPs and with only single level grids produced the worst results. These results fit with our current understanding of SfM uncertainty (e.g., James et al., 2020; Sanz-Ablanedo et al., 2020). Specifically, this means that for those SfM models where the images were calibrated with GCPs both precision and accuracy are orders of magnitudes higher than for the models 465 where the images were only directly geo-referenced (Table 2). We note here that the accuracy values reported in Table 2 for directly referenced models include systematic GPS errors of up to 200 m (S9) for the UAV platform, an issue that has been reported for the UAV platform family used in our study (e.g., Cook and Dietze, 2019). Furthermore, we can confirm that the selection of two flight altitudes, as proposed in some workflows (e.g., Carbonneau et al., 2018), seems not to improve the quality of the SfM model (see also Sanz-Ablanedo et al., 2020). In fact, the quality actually decreases as evidenced by the 470 results where we used a large number (>10) of images from a second altitude. These had then to be removed from the S9 models.

Finally, the use of images that were taken with cameras at oblique angles significantly improved the model quality, i.e., it resulted in lower systematic errors, as demonstrated by James and Robson (2014) James et al. (2020), or Sanz-Ablanedo et al. (2020). Here, we highlight that for the K1 survey, models that base on images taken in the JPEG format have a 475 significantly larger systematic error, expressed both as ‘doming’ and ‘bowling’, which is in stark contrast to the models where the images were taken in the DNG image format (Table 2). This was even the case for those models that included oblique camera positions and that were geo-referenced with GCPs. This effect was not observed in the results of the L2 survey. However, when comparing similar models (suffix \_C1 and \_C3) we identified a smaller systematic error for the models that base on images in the DNG format, both for L2 and K1. We note that we cannot use the S9 models for such a 480 comparison, since for these models separated flights were used to acquire the JPEG and DNG images (Table 1). Nevertheless, the aforementioned results suggest that the image acquisition format affects the quality of the SfM model, as







already suggested by James et al. (2020), at least for some survey geometries. Accordingly, the format of image acquisition should be considered during UAV survey planning, and we propose that  format can yield better results than images in the JPEG format.

#### 485 4.2 Precision and consistency of grain size measurements

The approach where we automatically segmented the images and where we fitted the ellipsoids with *PebbleCounts* (Purinton and Bookhagen, 2019) yielded consistent results when measuring grain sizes, both within surveys and between surveys (Figs. 5 and 6; Tables S4, S5). The combined bootstrapping and Monte Carlo (MC) approach allowed us to estimate the difference between the modelled and the photo-measured median percentile value, which is less than 5% for single  
490 orthophotos and 10% for orthomosaics for all percentiles (Table S5). Thus, both the modelled median and 95% confidence intervals are representative of the grain size distributions measured on the photos. The median of the modelled percentile uncertainty (95% CI) relative to the photo-measured percentile varied between survey sites (~7 to 15% for K1, ~16 to 42% for L2 and ~8 to 29% for S9; Table S4). Similarly, the mean relative uncertainties (95% CI) for individual percentiles, such as the  $D_{50}$ , varied from ~8 to 11% for K1, ~17 to 32% for L2 and ~10 to 22% for S9 (Table 3). Relative uncertainty values  
495 for the  $D_{84}$  and  $D_{96}$  increased, compared to the  $D_{50}$ , but followed the same trends with up to a 39% relative uncertainty for the  $D_{96}$  in L2. These results allow us to successfully identify two different grain size populations for regions A and B, respectively, in the S9 surveys (Table 3 and Figs. 7e-h). For K1 where the sampling regions were almost identical (Fig. 1), all grain size results were consistent (Table 3 and Figs. 7a, b; see also Table S5). For L2, the large uncertainties prevent us from drawing such inferences (Figs. 7c, d). At a closer inspection, these findings have some interesting implications.

500 In particular, because the modelled percentile uncertainty depends on the number of grains that could be identified, i.e., on the counting statistics, the percentile precision increases with the larger number of grains that were measured (Table S5). This is what we observed, and such results are in good agreement with reported statistical uncertainties that resulted from the application of comparable methods (Eaton et al., 2019). In addition, our data showed systematic differences if grain sizes were measured on single images (SI) or on orthophoto mosaics (OM). Grain size percentiles derived from orthophoto  
505 mosaics showed higher uncertainties than grain sizes measured on single orthoimages, both for the entire range of percentiles (Figs. 5 and 6) and for selected percentile values (Figs. 7 and 8). An exception is L2 where the uncertainty of the median grain size percentile was generally high (up to ~42%). Compared to the grain size data collected from orthophoto mosaics, the relative percentile uncertainty on the single image data was between 3 to 6% lower for K1 and between 0.6 to 8% lower for S9 surveys. Likewise, for individual key percentile values, i.e., the  $D_{50}$ ,  $D_{84}$  and  $D_{96}$ , the uncertainties on the data  
510 retrieved from orthophoto mosaics were between 2 and 9% higher across all models of K1 and S9. However, we acknowledge that for some L2 models, the uncertainties on the grain size data were higher if the data was collected from single images than if the measurements were accomplished on orthomosaics. We attribute this to a combination of imagery and segmentation traits (see Sect. 4.4).

---

Number: 1 Author: yourname Subject: Sticky Note Date: 29/06/2022 09:35:30

But at what cost? Does the bus speed on the new P4 match pace with the writing of a large DNG? Do you have to significantly reduce forward speed and thus take longer to finish the survey with the associated cost on batteries?



### 4.3 Grain size accuracy compared to field measurements

515 Grain sizes in close-range UAV imagery through image segmentation are measured on a 2D approximation of a 3D surface of particles, which might be affected by the sedimentary structure, e.g., imbrication or armouring, and projection effects. Additionally, a bias could be introduced during the segmentation of the images. Therefore, we compare the sizes of grains measured on a subset of the K1 imagery with a dataset where the grains we manually measured in the field to test how our grain size estimations hold up against field measured data (Fig. 9).

520 First, imagery-based grain size measurements result in an overestimation of the percentiles values compared to field-based surveys (Sect. 3.5), independent of the SfM model referencing strategy (Fig. 9). Such a systematic overestimation of grain sizes can even be found for models where the bundle adjustment was accomplished with ground control points and from single images (i.e., C1 and C2 curves in Fig. 9). This is most likely a result of an under-segmentation of grains in images, potential biases inherent to image based approaches, i.e., a 2D projection effect or partial overlapping of grains (Carbonneau et al., 2005), and/or a combination thereof. We note here that this systematic overestimation might have also have a survey-specific component. We base this inference on the results of other analyses, which were accomplished with the same segmentation software and which documented a systematic underestimation of related percentile values, thus hinting at an effect related to over-segmentation (Chardon et al., 2021). This issue might be addressed if (i) images are segmented semi-automatically where manual measurements are accomplished occasionally to set a benchmark (Burinton and Bookhagen, 530 2021), (ii) reference measurements are conducted for calibration purposes, (Chardon et al., 2021) or if (iii) the automated segmentation is improved. However, more research is needed to improve our understanding of systematic traits of segmentation-based grain sizes and the related dependency on survey-specific characteristics. We note that our K1 site where we did find this bias is not suited for such an endeavour.

Second, for all our K1 models, only grain sizes taken from single orthoimages (Figs. 9a, b) can be considered as acceptable, 535 i.e., agreeing within uncertainties, despite a systematic overestimation of the percentile values. Contrarily, grain size data from orthophoto mosaics are less accurate than from single images when compared to field measured data and additionally show some dependency on the SfM model strategy, or more likely, on the SfM model uncertainty (Figs. 9c, d). This reflects a general trend where only grain sizes from orthophoto mosaics were systematically varying with the UAV model geometry within surveys (e.g., Figs. 5b, 6b and Fig. 8). This implies that the measurement results depend on whether grain sizes were 540 collected on orthomosaics or on single images, and additionally on how the UAV survey was conducted if orthomosaics are used.

---

Number: 1      Author: yourname   Subject: Sticky Note      Date: 29/06/2022 09:37:00  
This was first observed by Woodget et al 2018 (cited here)

---

Author: yourname   Subject: Sticky Note      Date: 29/06/2022 09:38:10  
ok, noted below

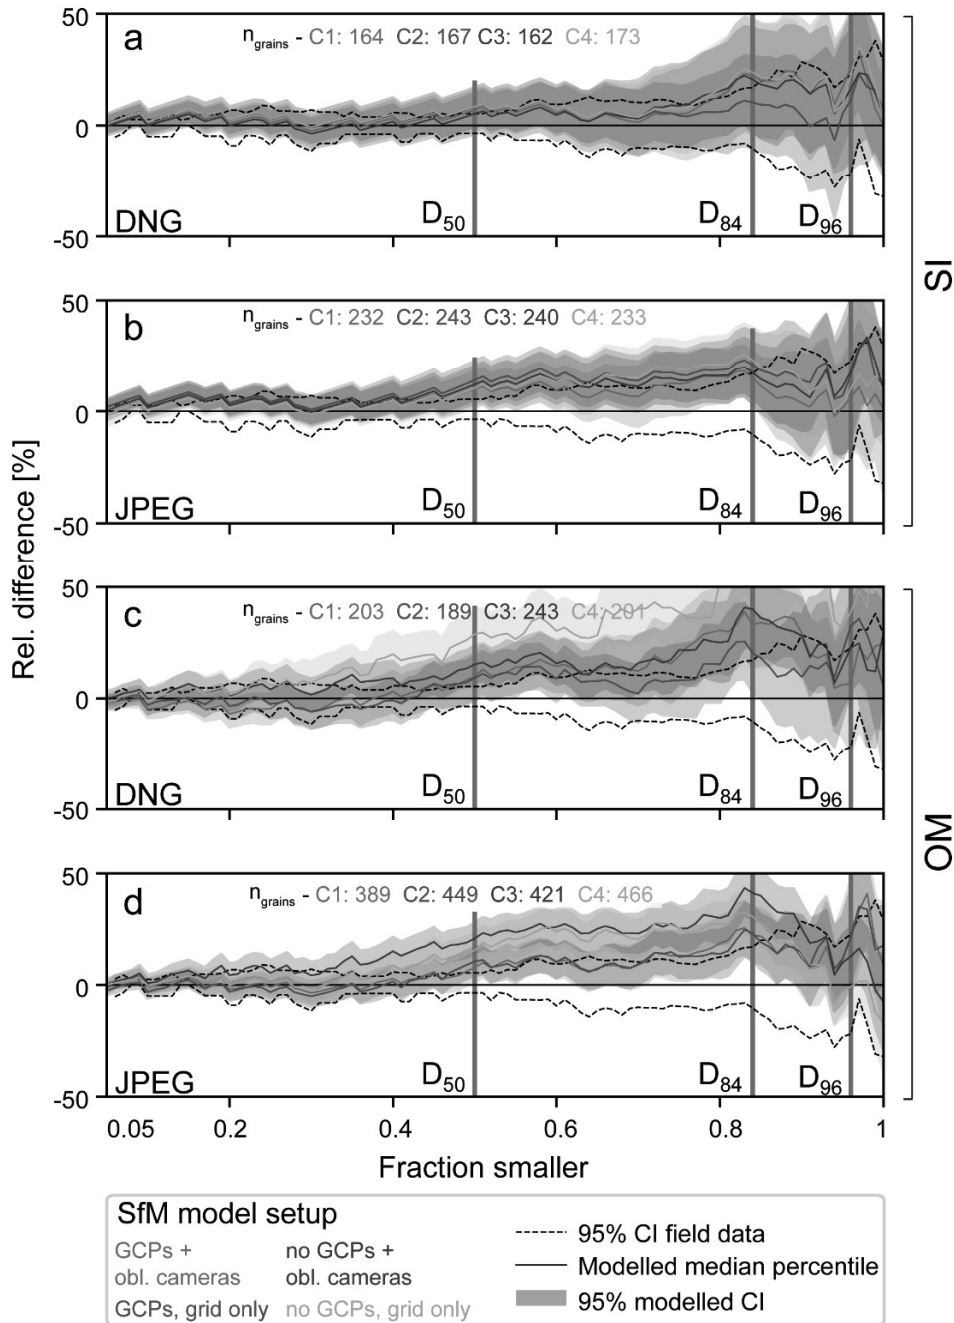

**Figure 9:** Relative difference between grain size percentiles estimated from UAV imagery to grain sizes, which were measured in the field for the region A of the Kander survey (K1). (a, b) Results for data from single orthoimages (SI). (c, d) Results for orthophoto mosaics (OM). DNG and JPEG indicates the image acquisition format. Key percentiles, i.e.,  $D_{50}$ ,  $D_{84}$  and  $D_{96}$ , are highlighted. The number of detected grains ( $n_{\text{grains}}$ ) and the data are colour-coded for SfM model setup (see Fig. 2 for detailed legend).

545



#### 4.4 Potential problems associated with orthophoto mosaics

Our results show that in some cases grain size data extracted from orthomosaics are less precise and less consistent (see Sect. 4.2) and less accurate when compared to field data (see Sect. 4.3). Similar inaccuracies were also reported by Woodget et al. (2018) upon measuring grain sizes on orthomosaics, albeit on the basis of statistical image properties. At this stage, we consider the following three reasons for the low accuracy and the lower precision in some grain size datasets that were collected on orthomosaics.

First, we used fixed locations to measure grain sizes, which means that an in-accurate SfM model might result in a shift of the view field particularly if grains are measured on orthophoto mosaics (Figs. 10a, b). Such a bias will not be introduced if grains are measured on single images. Furthermore, for orthomosaics, if the sizes of the grains on the selected bars vary between the different views, then the grain size distributions will be different. This was actually the case for the Entle (S9) surveys (Figs. 6 and 7). Second, local disturbances and image warping (Figs. 10c, d) that may result upon generating the orthomosaic may also affect the segmentation of the images. Indeed, we could find small image artefacts in all our generated orthomosaics. They were particularly prominent in imageries created from the L2 models, i.e., the overall lowest quality models. Finally, a strong variation in the segmentation performance can occur when the automated version of *PebbleCounts* is used, which might introduce a bias as only a small fraction of pebbles might be found. In this context, segmentation errors, which are introduced in response to an over- or under-segmentation of the images (i.e. more or fewer pebbles identified of a certain size), might be the source of an additional bias, particularly for datasets where few pebbles are measured (Figs. 10e, f). In all our results, some under-segmentation did occur, but interestingly this process was most prominent if orthophoto mosaics were used and if grains were measured on low quality images (i.e., L2 and partly S9). Accordingly, we use these conditions, and probably a combination of them, to explain the larger uncertainties on those grain size datasets that were collected from orthophoto mosaics compared to the results where grains were measured on single orthoimages.



### Spatial accuracy of UAV imagery

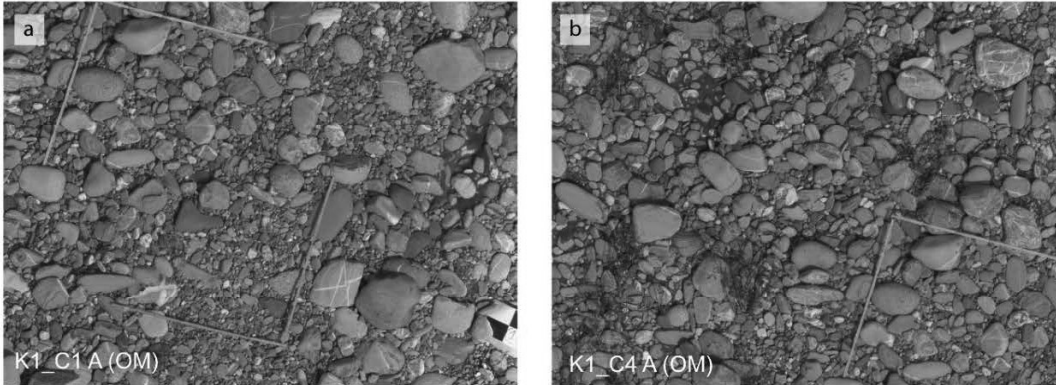

### Imagery distortion from SfM models

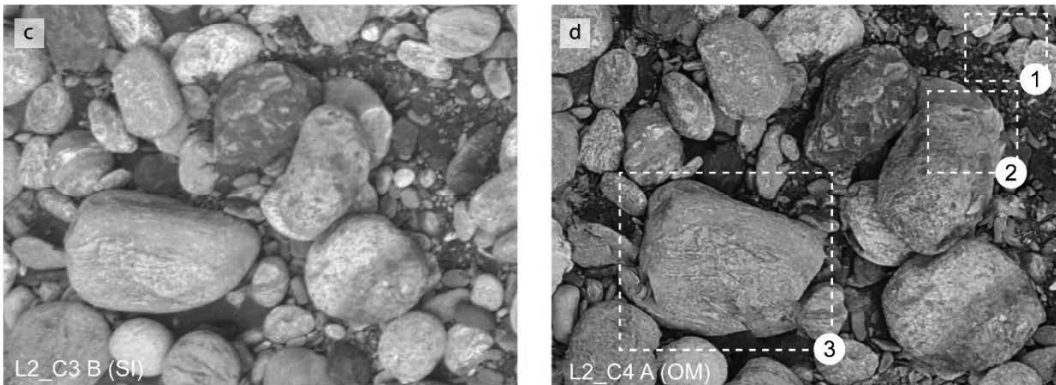

### Varying segmentation performance

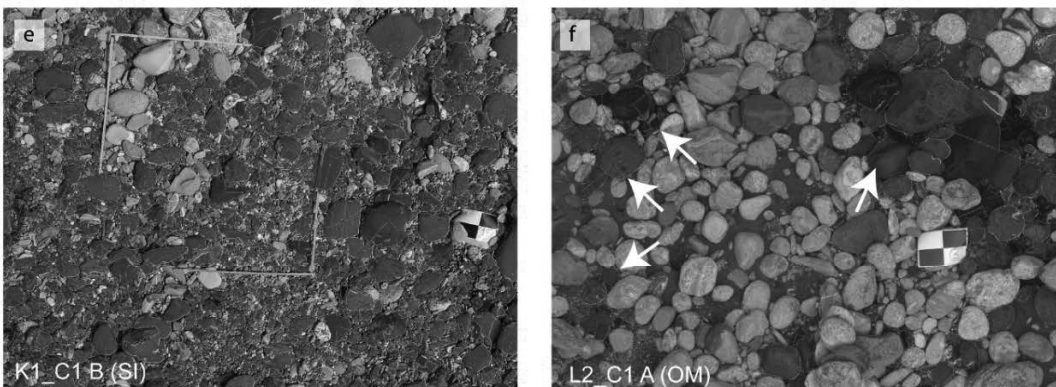

570 **Figure 10:** Systematic factors that influence grain size estimation from UAV imagery, especially from orthophoto mosaics (OM). (a,b) Effect of varying accuracy of SfM (Structure from Motion) used for referencing for orthophotomosaics which should display the same extent. (c,d) Comparison of undistorted single images (SI) with orthophoto mosaics, which highlight small scale image warping and artefacts: 1) Duplication from incorrect image stitching, 2) Blurring of pebble boundaries, and 3) irregular grain shapes. (e,f) Selected results highlighting the varying image segmentation performance. Examples of systematic under-segmentation marked with white arrows.



#### 575 4.5 Implications for workflows on grain size estimation

Our results have some general implications for the estimation of grain sizes from UAV acquired imagery. We will present these in the order of a typical workflow that is generally employed upon measuring grain size datasets with a UAV/SfM workflow (e.g., Fig. 3). For UAV surveys with a subsequent SfM processing a best practise to achieve highest quality in SfM models (e.g., James et al., 2020; Eltner and Sofia, 2020; Sanz-Abledo et al., 2020) includes a GCP referencing and the storage of the images in the raw format. Survey designs without GCPs might be acceptable for grain size estimation in cases where (i) a high-precision spatial allocation of the grains is not needed, a correct image referencing and undistorting is possible potentially by using a pre-calibrated camera model (see also Carbonneau et al., 2018). In such cases, we recommend measurements on undistorted single orthoimages, especially when grain size distributions are expected to vary and sampling is done only locally. All these recommendations are valid independent on the method for grain size estimation.

580 In principle, using a segmentation approach for grain size estimation allows for a rigorous error and uncertainty propagation. Specifically, SfM model uncertainties can be used for a statistically robust estimation of errors on grain datasets by combining a bootstrapping and Monte Carlo approach, as accomplished in this work. Even more, an error estimation can be accomplished for models without GCPs, for the case where a simple parametrization that only bases on a length and scale error is considered (see supporting Code S1). We emphasize that this is only possible when the image distance can be estimated. We also note that this approach allows to estimate uncertainties also for datasets where grains were measured in other imagery, e.g., images acquired with a handheld camera. Generally, this approach returns uncertainty values for both measurement results and statistical processing, which includes effects related to counting statistics. To our knowledge, no such possibility for the estimation of uncertainties exists for grain size estimations that are based on statistical image parameters. However, current segmentation techniques are prone to biases that result from under- or over-segmentations and 2D projection effects of 3D structures. Therefore, in such cases, reductions of inaccuracies might be achieved through manual filtering of grains during segmentation (e.g., Burinton and Bookhagen, 2019; Detert and Weitbrecht, 2012) and/or through a calibration of the measurements with a reference data set (e.g., Chardon et al., 2021), where data was collected in the field, as exemplified in this work. Such a strategy is likely to improve and the accuracy of grain size data and yields in an estimate of the related uncertainty.  <sup>1</sup>

#### 600 5. Conclusions

Our field-based approach in combination with the simple uncertainty modelling can be used to propagate all relevant uncertainties of SfM models onto grain size data that are extracted from segmented UAV imagery. The workflow proposed in this paper is applicable to any tasks that aim at measuring grain size data from images, and it allows to assess the sensitivity of such grain size data on the UAV survey strategy. This includes selection of the image acquisition format, for which the use of the raw image format during image acquisition instead of the JPEG format might reduce the systematic uncertainty in topographic models. For our setup, the image format used for grain size estimation was a key variable, where



---

Number: 1 Author: yourname Subject: Sticky Note Date: 29/06/2022 09:40:22

I think you've glossed over some practicalities. Acquisitions at 7m are slow and costly thus severely limiting the scale of work. This needs to be approached



an overall higher precision and accuracy was achieved if grain sizes were measured on undistorted single orthoimages rather than on orthophoto mosaics. Furthermore, general UAV survey conditions, e.g., light, wind or vegetation exert a control on the precision and accuracy of grain size data estimated from images, even if the topographic models used for referencing are of high quality. Contrarily, our grain size data is not very sensitive to the quality of the topographic model, as long as single images are used where distortions were corrected with a camera lens model during the photogrammetric processing.

### 6 Code availability

The code used for image processing and uncertainty estimation of grain size distributions is provided at <https://doi.org/110.5281/zenodo.6415047> as python files and executable jupyter notebooks, where the latter also serve as documentation. Additionally, we provide there also the python script used for estimating the camera distance.

### 7 Data availability

Photo-measured grain size data are provided along with field measured b-axes values for K1 in a csv format an all UAV images used for SfM model generation and all orthoimages (both SI and OM), in which we measured grain sizes, can be found at <https://doi.org/110.5281/zenodo.6415047>.

### 8 Author contribution

DM and FS conceptualized the research, while DM, AP and AL developed the methodology, including code development. Data collection in the field was done by DM, AP and GP with DM being responsible for data curation. DM interpreted the results with scientific input from ACW, AP and PG and prepared the manuscript and figures with contributions from all co-authors.

### 9 Competing interests

The authors declare that they have no conflict of interest.

### 10 Acknowledgements

We thank Flotron AG for providing us with the Leica Viva GS14 GPS antenna for the S9 survey.



## References

- 630 Attal, M., Mudd, S. M., Hurst, M. D., Weinman, B., Yoo, K., and Naylor, M.: Impact of change in erosion rate and landscape steepness on hillslope and fluvial sediments grain size in the Feather River basin (Sierra Nevada, California), *Earth Surf. Dyn.*, 3, 201–222, <https://doi.org/10.5194/esurf-3-201-2015>, 2015.
- Bekaddour, T., Schlunegger, F., Attal, M., and Norton, K. P.: Lateral sediment sources and knickzones as controls on spatio-temporal variations of sediment transport in an Alpine river, *Sedimentology*, 60, 342–357, <https://doi.org/10.1111/sed.12009>, 2013.
- 635 Van den Berg, F. and Schlunegger, F.: Alluvial cover dynamics in response to floods of various magnitudes: The effect of the release of glaciogenic material in a Swiss Alpine catchment, 141–142, 121–133, <https://doi.org/10.1016/j.geomorph.2011.12.030>, 2012.
- Brasington, J., Vericat, D., and Rychkov, I.: Modeling river bed morphology, roughness, and surface sedimentology using high resolution terrestrial laser scanning, *Water Resour. Res.*, 48, 1–18, <https://doi.org/10.1029/2012WR012223>, 2012.
- 640 Bunte, K. and Abt, S. R.: Sampling Surface and Subsurface Particle-Size Distributions in Wadable Gravel- and Cobble-Bed Streams for Analyses in Sediment Transport, *Hydraulics, and Streambed Monitoring*, 450, 2001.
- Buscombe, D.: Estimation of grain-size distributions and associated parameters from digital images of sediment, *Sediment. Geol.*, 210, 1–10, <https://doi.org/10.1016/j.sedgeo.2008.06.007>, 2008.
- 645 Buscombe, D.: Transferable wavelet method for grain-size distribution from images of sediment surfaces and thin sections, and other natural granular patterns, *Sedimentology*, 60, 1709–1732, <https://doi.org/10.1111/sed.12049>, 2013.
- Buscombe, D.: SediNet: a configurable deep learning model for mixed qualitative and quantitative optical granulometry, *Earth Surf. Process. Landforms*, 45, 638–651, <https://doi.org/10.1002/esp.4760>, 2020.
- Buscombe, D., Rubin, D. M., and Warrick, J. A.: A universal approximation of grain size from images of noncohesive sediment, *J. Geophys. Res. Earth Surf.*, 115, 1–17, <https://doi.org/10.1029/2009jf001477>, 2010.
- 650 Butler, J. B., Lane, S. N., and Chandler, J. H.: Automated extraction of grain-size data from gravel surfaces using digital image processing, *J. Hydraul. Res.*, 39, 519–529, <https://doi.org/10.1080/00221686.2001.9628276>, 2001.
- Carbonneau, P. E. and Dietrich, J. T.: Cost-effective non-metric photogrammetry from consumer-grade sUAS: implications for direct georeferencing of structure from motion photogrammetry, *Earth Surf. Process. Landforms*, 42, 473–486, <https://doi.org/10.1002/esp.4012>, 2017.
- 655 Carbonneau, P. E., Lane, S. N., and Bergeron, N. E.: Cost-effective non-metric close-range digital photogrammetry and its application to a study of coarse gravel river beds, *Int. J. Remote Sens.*, 24, 2837–2854, <https://doi.org/10.1080/01431160110108364>, 2003.
- Carbonneau, P. E., Lane, S. N., and Bergeron, N. E.: Catchment-scale mapping of surface grain size in gravel bed rivers using airborne digital imagery, *Water Resour. Res.*, 40, 1–11, <https://doi.org/10.1029/2003WR002759>, 2004.
- 660



- Carbonneau, P. E., Bergeron, N., and Lane, S. N.: Automated grain size measurements from airborne remote sensing for long profile measurements of fluvial grain sizes, *Water Resour. Res.*, 41, 1–9, <https://doi.org/10.1029/2005WR003994>, 2005.
- Carbonneau, P. E., Bizzi, S., and Marchetti, G.: Robotic photosieving from low-cost multirotor sUAS: a proof-of-concept, *Earth Surf. Process. Landforms*, 43, 1160–1166, <https://doi.org/10.1002/esp.4298>, 2018.
- 665 Carrivick, J. L. and Smith, M. W.: Fluvial and aquatic applications of Structure from Motion photogrammetry and unmanned aerial vehicle/drone technology, *Wiley Interdiscip. Rev. Water*, 6, e1328, <https://doi.org/10.1002/wat2.1328>, 2019.
- Chardon, V., Piasny, G., and Schmitt, L.: Comparison of software accuracy to estimate the bed grain size distribution from digital images: A test performed along the Rhine River, *River Res. Appl.*, 1–10, <https://doi.org/10.1002/rra.3910>, 2021.
- 670 Church, M., Hassan, M. A., and Wolcott, J. F.: Stabilizing self-organized structures in gravel-bed stream channels: Field and experimental observations, *Water Resour. Res.*, 34, 3169–3179, <https://doi.org/10.1029/98WR00484>, 1998.
- Cook, K. L.: An evaluation of the effectiveness of low-cost UAVs and structure from motion for geomorphic change detection, 278, 195–208, <https://doi.org/10.1016/j.geomorph.2016.11.009>, 2017.
- Cook, K. L. and Dietze, M.: Short Communication: A simple workflow for robust low-cost UAV-derived change detection without ground control points, *Earth Surf. Dyn.*, 7, 1009–1017, <https://doi.org/10.5194/esurf-7-1009-2019>, 2019.
- 675 Detert, M. and Weitbrecht, V.: Automatic object detection to analyze the geometry of gravel grains - A free stand-alone tool, *River Flow 2012 - Proc. Int. Conf. Fluv. Hydraul.*, 1, 595–600, 2012.
- Dunne, K. B. J. and Jerolmack, D. J.: Evidence of, and a proposed explanation for, bimodal transport states in alluvial rivers, *Earth Surf. Dyn.*, 6, 583–594, <https://doi.org/10.5194/esurf-6-583-2018>, 2018.
- 680 Eaton, B. C., Moore, R. D., and MacKenzie, L. G.: Percentile-based grain size distribution analysis tools (GSDtools) – estimating confidence limits and hypothesis tests for comparing two samples, *Earth Surf. Dyn.*, 7, 789–806, <https://doi.org/10.5194/esurf-7-789-2019>, 2019.
- Eltner, A. and Sofia, G.: *Structure from motion photogrammetric technique*, 1st ed., Elsevier B.V., 1–24 pp., <https://doi.org/10.1016/B978-0-444-64177-9.00001-1>, 2020.
- 685 Eltner, A., Kaiser, A., Castillo, C., Rock, G., Neugirg, F., and Abellán, A.: Image-based surface reconstruction in geomorphometry-merits, limits and developments, *Earth Surf. Dyn.*, 4, 359–389, <https://doi.org/10.5194/esurf-4-359-2016>, 2016.
- Fonstad, M. A., Dietrich, J. T., Courville, B. C., Jensen, J. L., and Carbonneau, P. E.: Topographic structure from motion: A new development in photogrammetric measurement, *Earth Surf. Process. Landforms*, 38, 421–430, <https://doi.org/10.1002/esp.3366>, 2013.
- 690 Graham, D. J., Reid, I., and Rice, S. P.: Automated sizing of coarse-grained sediments: Image-processing procedures, *Math. Geol.*, 37, 1–28, <https://doi.org/10.1007/s11004-005-8745-x>, 2005.
- Grant, G. E.: The Geomorphic Response of Gravel-Bed Rivers to Dams: Perspectives and Prospects, in: *Gravel-Bed Rivers*, John Wiley & Sons, Ltd, Chichester, UK, 165–181, <https://doi.org/10.1002/9781119952497.ch15>, 2012.

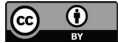

- 695 Griffiths, D. and Burningham, H.: Comparison of pre- and self-calibrated camera calibration models for UAS-derived nadir imagery for a SfM application, *Prog. Phys. Geogr.*, 43, 215–235, <https://doi.org/10.1177/0309133318788964>, 2019.
- Ibbeken, H. and Schleyer, R.: Photo-sieving: A method for grain-size analysis of coarse-grained, unconsolidated bedding surfaces, *Earth Surf. Process. Landforms*, 11, 59–77, <https://doi.org/10.1002/esp.3290110108>, 1986.
- James, M. R. and Robson, S.: Straightforward reconstruction of 3D surfaces and topography with a camera: Accuracy and geoscience application, *J. Geophys. Res. Earth Surf.*, 117, n/a-n/a, <https://doi.org/10.1029/2011JF002289>, 2012.
- 700 James, M. R. and Robson, S.: Mitigating systematic error in topographic models derived from UAV and ground-based image networks, *Earth Surf. Process. Landforms*, 39, 1413–1420, <https://doi.org/10.1002/esp.3609>, 2014.
- James, M. R., Robson, S., and Smith, M. W.: 3-D uncertainty-based topographic change detection with structure-from-motion photogrammetry: precision maps for ground control and directly georeferenced surveys, *Earth Surf. Process. Landforms*, 42, 1769–1788, <https://doi.org/10.1002/esp.4125>, 2017a.
- 705 James, M. R., Robson, S., d’Oleire-Oltmanns, S., and Niethammer, U.: Optimising UAV topographic surveys processed with structure-from-motion: Ground control quality, quantity and bundle adjustment, 280, 51–66, <https://doi.org/10.1016/j.geomorph.2016.11.021>, 2017b.
- James, M. R., Antoniazza, G., Robson, S., and Lane, S. N.: Mitigating systematic error in topographic models for geomorphic change detection: accuracy, precision and considerations beyond off-nadir imagery, *Earth Surf. Process. Landforms*, 45, 2251–2271, <https://doi.org/10.1002/esp.4878>, 2020.
- Kondolf, G. M. and Wolman, M. G.: The sizes of salmonid spawning gravels, *Water Resour. Res.*, 29, 2275–2285, <https://doi.org/10.1029/93WR00402>, 1993.
- Lamb, M. P. and Venditti, J. G.: The grain size gap and abrupt gravel-sand transitions in rivers due to suspension fallout, *Geophys. Res. Lett.*, 43, 3777–3785, <https://doi.org/10.1002/2016GL068713>, 2016.
- 715 Lang, N., Irniger, A., Rozniak, A., Hunziker, R., Wegner, J. D., and Schindler, K.: GRAINet: mapping grain size distributions in river beds from UAV images with convolutional neural networks, *Hydrol. Earth Syst. Sci.*, 25, 2567–2597, <https://doi.org/10.5194/hess-25-2567-2021>, 2021.
- O’Connor, J., Smith, M. J., and James, M. R.: Cameras and settings for aerial surveys in the geosciences: Optimising image data, *Prog. Phys. Geogr.*, 41, 325–344, <https://doi.org/10.1177/0309133317703092>, 2017.
- 720 Over, J.-S. R., Ritchie, A. C., Kranenburg, C. J., Jenna A., B., Buscombe, D., Noble, T., Sherwood, C. R., Warrick, J. A., and Wernette, P. A.: Processing Coastal Imagery With Agisoft Metashape Professional Edition , Version 1 . 6 — Structure From Motion Workflow Documentation, U.S. Geol. Surv. Open-File Rep. 2021–1039, 1–45, <https://doi.org/10.3133/ofr20211039>, 2021.
- 725 Pearson, E., Smith, M. W., Klaar, M. J., and Brown, L. E.: Can high resolution 3D topographic surveys provide reliable grain size estimates in gravel bed rivers?, 293, 143–155, <https://doi.org/10.1016/j.geomorph.2017.05.015>, 2017.



- Piégay, H., Arnaud, F., Belletti, B., Bertrand, M., Bizzi, S., Carbonneau, P., Dufour, S., Liébault, F., Ruiz-Villanueva, V., and Slater, L.: Remotely sensed rivers in the Anthropocene: state of the art and prospects, *Earth Surf. Process. Landforms*, 45, 157–188, <https://doi.org/10.1002/esp.4787>, 2020.
- 730 Pitlick, J., Recking, A., Liébault, F., Misset, C., Piton, G., and Vazquez-Tarrio, D.: Sediment Production in French Alpine Rivers, *Water Resour. Res.*, 57, 1–23, <https://doi.org/10.1029/2021wr030470>, 2021.
- Purinton, B. and Bookhagen, B.: Introducing PebbleCounts: A grain-sizing tool for photo surveys of dynamic gravel-bed rivers, *Earth Surf. Dyn. Discuss.*, 1–33, <https://doi.org/10.5194/esurf-2019-20>, 2019.
- 735 Purinton, B. and Bookhagen, B.: Tracking Downstream Variability in Large Grain-Size Distributions in the South-Central Andes, *J. Geophys. Res. Earth Surf.*, 126, 1–29, <https://doi.org/10.1029/2021JF006260>, 2021.
- Rubin, D. M.: A simple autocorrelation algorithm for determining grain size from digital images of sediment, *J. Sediment. Res.*, 74, 160–165, <https://doi.org/10.1306/052203740160>, 2004.
- Sanz-Ablanedo, E., Chandler, J. H., Ballesteros-Pérez, P., and Rodríguez-Pérez, J. R.: Reducing systematic dome errors in digital elevation models through better UAV flight design, *Earth Surf. Process. Landforms*, 45, 2134–2147, <https://doi.org/10.1002/esp.4871>, 2020.
- 740 Schlunegger, F., Delunel, R., and Garefalakis, P.: Short communication: Field data reveal that the transport probability of clasts in Peruvian and Swiss streams mainly depends on the sorting of the grains, *Earth Surf. Dyn.*, 8, 717–728, <https://doi.org/10.5194/esurf-8-717-2020>, 2020.
- Smith, M. W. and Vericat, D.: From experimental plots to experimental landscapes: Topography, erosion and deposition in sub-humid badlands from Structure-from-Motion photogrammetry, *Earth Surf. Process. Landforms*, 40, 1656–1671, <https://doi.org/10.1002/esp.3747>, 2015.
- 745 Sulaiman, M. S., Sinnakaudan, S. K., Ng, S. F., and Strom, K.: Application of automated grain sizing technique (AGS) for bed load samples at Rasil River: A case study for supply limited channel, 121, 330–343, <https://doi.org/10.1016/j.catena.2014.05.013>, 2014.
- 750 Swisstopo: Swiss Positioning Service swipos, <https://www.swisstopo.admin.ch/en/geodata/geoservices/swipos.html>, accessed 26 February 2022.
- Vázquez-Tarrió, D., Borgniet, L., Liébault, F., and Recking, A.: Using UAS optical imagery and SfM photogrammetry to characterize the surface grain size of gravel bars in a braided river (Vénéon River, French Alps), 285, 94–105, <https://doi.org/10.1016/j.geomorph.2017.01.039>, 2017.
- 755 Whittaker, A. C., Attal, M., and Allen, P. A.: Characterising the origin, nature and fate of sediment exported from catchments perturbed by active tectonics, *Basin Res.*, 22, 809–828, <https://doi.org/10.1111/j.1365-2117.2009.00447.x>, 2010.
- Wohl, E. E., Anthony, D. J., Madsen, S. W., and Thompson, D. M.: A comparison of surface sampling methods for coarse fluvial sediments, *Water Resour. Res.*, 32, 3219–3226, <https://doi.org/10.1029/96WR01527>, 1996.



- 760 Wolcott, J. and Church, M.: Strategies for sampling spatially heterogeneous phenomena: the example of river gravels, *J. Sediment. Petrol.*, 61, 534–543, <https://doi.org/10.1306/D4267753-2B26-11D7-8648000102C1865D>, 1991.
- Wolman, M. G.: A method of sampling coarse river-bed material, *Trans. Am. Geophys. Union*, 35, 951, <https://doi.org/10.1029/TR035i006p00951>, 1954.
- Woodget, A. S. and Austrums, R.: Subaerial gravel size measurement using topographic data derived from a UAV-SfM approach, *Earth Surf. Process. Landforms*, 42, 1434–1443, <https://doi.org/10.1002/esp.4139>, 2017.
- 765 Woodget, A. S., Fyffe, C., and Carbonneau, P. E.: From manned to unmanned aircraft: Adapting airborne particle size mapping methodologies to the characteristics of sUAS and SfM, *Earth Surf. Process. Landforms*, 43, 857–870, <https://doi.org/10.1002/esp.4285>, 2018.
